1 **Title:**

2 **Chloride ions evoke taste sensations by binding to the extracellular ligand-binding**  
3 **domain of sweet/umami taste receptors**

4

5 **Authors:**

6 Nanako Atsumi<sup>1†</sup>, Keiko Yasumatsu<sup>2†</sup>, Yuriko Takashina<sup>3</sup>, Chiaki Ito<sup>1</sup>, Norihisa Yasui<sup>1</sup>, Robert  
7 F. Margolskee<sup>4</sup>, Atsuko Yamashita<sup>1</sup>

8 <sup>†</sup>These authors contributed equally to this work.

9

10 **Affiliation:**

11 <sup>1</sup>Graduate School of Medicine, Dentistry and Pharmaceutical Sciences, Okayama University,  
12 Okayama, Japan, <sup>2</sup>Oral Health Science Center, Tokyo Dental College, Tokyo, <sup>3</sup>School of  
13 Pharmaceutical Sciences, Okayama University, Okayama, Japan, <sup>4</sup>Monell Chemical Senses  
14 Center, Philadelphia, PA, USA.

15

16 **Corresponding author:**

17 Atsuko Yamashita, Graduate School of Medicine, Dentistry and Pharmaceutical Sciences,  
18 Okayama University, 1-1-1, Tsushima-naka, Kita-ku, Okayama 600-8530, Japan. Fax:  
19 +81-86-251-7974. E-mail: [a\\_yama@okayama-u.ac.jp](mailto:a_yama@okayama-u.ac.jp).

20

21 **Abstract**

22 Salt taste sensation is multifaceted: NaCl at low or high concentrations is preferably or  
23 aversively perceived through distinct pathways. Cl<sup>-</sup> is thought to participate in taste sensation  
24 through an unknown mechanism. Here we describe Cl<sup>-</sup> ion binding and the response of taste  
25 receptor type 1 (T1r), a receptor family composing sweet/umami receptors. The T1r2a/T1r3  
26 heterodimer from the medaka fish, currently the sole T1r amenable to structural analyses,  
27 exhibited a specific Cl<sup>-</sup> binding in the vicinity of the amino-acid-binding site in the  
28 ligand-binding domain (LBD) of T1r3, which is likely conserved across species, including  
29 human T1r3. The Cl<sup>-</sup> binding induced a conformational change in T1r2a/T1r3LBD at sub- to  
30 low-mM concentrations similar to canonical taste substances. Furthermore, oral Cl<sup>-</sup>  
31 application to mice increased impulse frequencies of taste nerves connected to T1r-expressing  
32 taste cells and promoted their behavioral preferences attenuated by a T1r-specific blocker or  
33 T1r3 knock-out. These results suggest that the Cl<sup>-</sup> evokes taste sensations by binding to T1r,  
34 thereby serving as another preferred salt taste pathway at a low concentration.

35

## 36 **Introduction**

37 The taste sensation is initiated by specific interactions between chemicals in food and taste  
38 receptors in taste buds in the oral cavity. In vertebrates, the chemicals are grouped into five  
39 basic modalities: sweet, umami, bitter, salty, and sour. This sensation occurs through taste  
40 receptor recognition specific to a group of chemicals representing each taste modality (Taruno  
41 *et al*, 2021). Regarding the salty taste, the preferable taste, ~100 mM concentration of table  
42 salt, is evoked by specific interaction between the epithelial sodium channel (ENaC) and  
43 sodium ion (Chandrashekar *et al*, 2010) (Figure 1). Notably, salt sensation exhibits multifaced  
44 properties (Roper, 2015), thereby suggesting the existence of an adequate concentration range  
45 for salt intake to maintain the homeostasis of body fluid concentration. For example, high  
46 concentrations of salt over levels perceived as a preferred taste, such as ~500 mM, stimulate  
47 bitter and sour taste cells and are perceived as an aversive taste (Oka *et al*, 2013). Conversely,  
48 low salt concentrations under the “preferable” concentration, such as several mM to a hundred  
49 mM concentrations, are perceived as sweet by human panels (Bartoshuk *et al*, 1964;  
50 Bartoshuk *et al*, 1978; Cardello, 1979). However, its mechanism has never been extensively  
51 pursued. The various impacts of the salt taste sensation indicate multiple salt detection  
52 pathways in taste buds (Roper, 2015). Moreover, another component of table salt, the chloride  
53 ion, participates in taste sensation because of the existence of the “anion effect”: the salty  
54 taste is most strongly perceived when the counter anion is a chloride ion (Ye *et al*, 1991).  
55 Several reports suggested a certain cellular/molecular machinery underlying anion-sensitive  
56 Na<sup>+</sup>-detection or Cl<sup>-</sup>-detection, which is independent of ENaC (Lewandowski *et al*, 2016;  
57 Roebber *et al*, 2019). Indeed, a recent study indicated that transmembrane channel-like 4  
58 (TMC4) expressed in taste buds involves high-concentration Cl<sup>-</sup>-sensation (Kasahara *et al*,  
59 2021). Nevertheless, no candidate molecule capable of sensing low or preferable  
60 concentrations of Cl<sup>-</sup> has been elucidated. Therefore, the complete understanding of salt taste

61 sensation, including the mechanism of chloride ion detection, remains unclear.

62 Unlike salt taste sensation, those for nutrients as sugars, amino acids, and  
63 nucleotides are understood as sweet and umami sensations through specific receptor proteins  
64 (Li *et al*, 2002; Nelson *et al*, 2002; Nelson *et al*, 2001). Sweet and umami receptors are  
65 composed of taste receptor type 1 (T1r) proteins in the class C G protein-coupled receptor  
66 family. In humans, the T1r1/T1r3 heterodimer serves as the umami taste receptor and  
67 responds to amino acids as L-glutamate and aspartate, and nucleotides. In contrast, the  
68 T1r2/T1r3 heterodimer is the sweet taste receptor and responds to sugars. We previously  
69 elucidated the crystallographic structure of the medaka fish T1r2a/T1r3 extracellular  
70 ligand-binding domain (LBD) (Nuemket *et al*, 2017), which is currently the sole reported  
71 structure of T1rs. In the structure, the amino acid-binding was observed in the middle of the  
72 LBD of T1r2a and T1r3 subunits, which was consistent with the fact that T1r2a/T1r3 is an  
73 amino-acid receptor (Oike *et al*, 2007). Furthermore, chloride ion binding was found in the  
74 vicinity of the amino-acid binding site in T1r3 (Figure 2A). So far, the physiological  
75 significance of Cl<sup>-</sup>-binding for T1rs functions remains unexplored. Nevertheless, chloride  
76 ions regulate other receptors in class C G protein-coupled receptors (GPCRs), such as  
77 metabotropic glutamate receptors (mGluRs) and calcium-sensing receptors (CaSRs), and act  
78 as positive modulators for agonist binding (Eriksen & Thomsen, 1995; Kuang & Hampson,  
79 2006; Liu *et al*, 2020; Tora *et al*, 2018; Tora *et al*, 2015). The potential effect of Cl<sup>-</sup>-binding  
80 on T1r receptor function is of significant interest under these conditions.

81 Here, we investigated the Cl<sup>-</sup> actions on T1rs using structural, biophysical, and  
82 physiological analyses. The Cl<sup>-</sup> binding to the LBD was investigated using the medaka fish  
83 T1r2a/T1r3LBD, which is amenable to structural and biophysical analyses. Since the Cl<sup>-</sup>  
84 -binding site in T1r3 was conserved across various species, taste nerve recordings from mice  
85 were used to investigate the physiological significance of Cl<sup>-</sup>. The results suggest that Cl<sup>-</sup>

86 induces the moderate response via T1rs, thereby implying that T1rs are involved in Cl<sup>-</sup>  
87 sensation in taste buds.

88

## 89 **Results**

### 90 **Cl<sup>-</sup>-binding site in T1r3**

91 In the previously reported structure of T1r2a/T1r3LBD crystallized in the presence of NaCl,  
92 bound Cl<sup>-</sup> was identified based on electron density and binding distances (Nuemket *et al.*,  
93 2017). To verify the Cl<sup>-</sup>-binding, Cl<sup>-</sup> in the T1r2a/T1r3LBD crystal was substituted with Br<sup>-</sup>,  
94 a halogen ion amenable for specific detection by anomalous scattering using a synchrotron  
95 light source (Figure 2—figure supplement 1). The diffraction data from the crystal resulted in  
96 an anomalous difference Fourier peak at 14.1  $\sigma$  at the site in the vicinity of the amino-acid  
97 binding site in T1r3, where Cl<sup>-</sup> was originally bound (Figure 2B, Figure 2—figure  
98 supplement 2). For further confirmation, the anomalous data of the original crystal containing  
99 Cl<sup>-</sup> was collected at 2.7 Å, where the anomalous peak for Cl and several other elements such  
100 as Ca or S can be detected (Figure 2—figure supplement 1). The resultant anomalous  
101 difference Fourier map showed a peak at the bound Cl<sup>-</sup> position, while all the other peaks  
102 were observed at the S atoms in the protein (Figure 2C, Figure 2—figure supplement 2).  
103 These results verify that the site is able to bind halogen ions, likely accommodating Cl<sup>-</sup> under  
104 physiological conditions.

105 Cl<sup>-</sup> was coordinated at the binding site by the side-chain hydroxyl group of Thr105  
106 and the main-chain amide groups of Gln148 and Ser149 (Figure 2D). These main-chain  
107 coordinating residues are followed by Ser150, a critical residue for binding amino-acid  
108 ligands (Nuemket *et al.*, 2017). Furthermore, the loop regions where Thr105 and the  
109 Gln148-Ser150 locate are followed by helices B and C, respectively. These helices are  
110 essential structural units at the heterodimer interface (Nuemket *et al.*, 2017) (Figure 2A).

111 They are known to reorient upon agonist binding, resulting in conformation rearrangement of  
112 the subunits in the dimer, likely inducing receptor activation in class C GPCRs (Koehl *et al*,  
113 2019; Kunishima *et al*, 2000). In addition, the side-chain hydroxyl group of Ser149, which  
114 serves as a cap for the positive helix dipole of helix C, simultaneously functions as a distal  
115 ligand for Cl<sup>-</sup> coordination. Therefore, the Cl<sup>-</sup> binding at this site is important for organizing  
116 the structure of the amino-acid binding site and the heterodimer interface.

117 The Cl<sup>-</sup>-binding site observed in the crystal structure is most likely conserved  
118 among T1r3s in various organisms, such as humans (Figure 2E). Thr105, the residue that  
119 provides the side-chain-coordinating ligand for Cl<sup>-</sup>-binding, is strictly conserved as either  
120 serine or threonine among T1r3s. Additionally, the amino-acid sequence motifs surrounding  
121 the main-chain-coordinating ligands, FP<sup>45</sup>L and VIGP $\zeta^{148}\zeta^{149}$ , where “ $\zeta$ ” is a hydrophilic  
122 amino acid, are well conserved to present the main-chain amide groups to coordinate Cl<sup>-</sup> with  
123 an appropriate geometry. Notably, the site structurally corresponds to the Cl<sup>-</sup>-binding site in  
124 the hormone-binding domain of the atrial natriuretic peptide receptor (ANPR) (Figure 2F, 2G),  
125 in which Cl<sup>-</sup> positively regulates the peptide hormone binding (Misono, 2000). Although  
126 ANPR is not a member of class C GPCR, the hormone-binding domain in ANPR shares a  
127 similar structural fold with LBD of T1rs and other class C GPCRs, and bacterial  
128 periplasmic-binding proteins (Kunishima *et al.*, 2000; van den Akker *et al*, 2000).  
129 Accordingly, the conservation of the structure and the sequence motif at the Cl<sup>-</sup>-binding site  
130 at ANPR is also observed on mGluRs (Ogawa *et al*, 2010). Indeed, Cl<sup>-</sup> binding at the site  
131 corresponding to that in T1r3 was observed in several mGluR and CaSR structures (Monn *et*  
132 *al*, 2015b; Zhang *et al*, 2016) (Figure 2F, 2G) and was identified as a potential site responsible  
133 for regulating agonist binding (Liu *et al.*, 2020; Tora *et al.*, 2015). These results strongly  
134 imply the possibility that Cl<sup>-</sup> has some actions on T1r receptor functions.

135 In contrast, conservation at the Thr105 position was not observed among T1r1 and

136 T1r2 (Figure 2E). Evidently, no significant anomalous peak derived from Br<sup>-</sup> or Cl<sup>-</sup>-binding  
137 was observed in the crystal structure at the corresponding site in T1r2a (Figure 2B, 2C).  
138 His100 in T1r2a, which corresponds to Thr105 in T1r3, adopted a significantly different  
139 side-chain conformation from that of Thr105 in T1r3 (Figure 2—figure supplement 2).  
140 Therefore, T1r1 and T1r2's ability to bind Cl<sup>-</sup> is unlikely.

141 In addition to the Cl<sup>-</sup>-binding site discussed above, the Br<sup>-</sup>-substituted crystal  
142 exhibited an anomalous peak at 8.5  $\sigma$  in T1r2a, at a position close to the Lys265 side-chain  
143  $\epsilon$ -amino group (Figure 2B, Figure 2—figure supplement 2). Nevertheless, Cl<sup>-</sup>-binding was  
144 not observed in the original Cl<sup>-</sup>-contained crystal. This is further confirmed by the absence of  
145 an anomalous peak at this position in the data collected at 2.7 Å (Figure 2C, Figure 2—figure  
146 supplement 2). Therefore, the site might have the ability to bind anions such as Br<sup>-</sup> or larger;  
147 but be not specific to Cl<sup>-</sup>. In human T1r1, the residue corresponding to Lys265 (Arg277) was  
148 suggested as a critical residue for activities of inosine monophosphate, an umami enhancer  
149 (Zhang *et al*, 2008).

150

### 151 **Cl<sup>-</sup>-binding properties in T1r2a/T1r3LBD**

152 To investigate the Cl<sup>-</sup> actions on T1r functions, we first examined the properties of the Cl<sup>-</sup>  
153 -binding to medaka T1r2a/T1r3LBD using various biophysical techniques. For this purpose,  
154 the purified T1r2a/T1r3LBD was subjected to differential scanning fluorimetry (DSF), which  
155 we previously used for the amino acid-binding analysis (Yoshida *et al*, 2019). In order to  
156 prepare a Cl<sup>-</sup>-free condition, Cl<sup>-</sup> in the sample was substituted with gluconate, as it is unlikely  
157 accommodated in the Cl<sup>-</sup>-site due to its much larger size. We confirmed that gluconate does  
158 not serve as a ligand for T1r2a/T1r3LBD (Figure 3—figure supplement 1).

159 The addition of Cl<sup>-</sup> to the Cl<sup>-</sup>-free T1r2a/T1r3LBD sample resulted in thermal  
160 stabilization of the protein (Figure 3A), which is indicative of Cl<sup>-</sup> binding to the protein. The

161 apparent  $K_d$  value for  $\text{Cl}^-$  estimated by the melting temperatures ( $T_m$ ) at various  $\text{Cl}^-$   
162 concentrations was  $\sim 110 \mu\text{M}$  (Figure 3B, Table 1). The  $\text{Cl}^-$ -dependent thermal stabilization  
163 was confirmed by the fluorescence-detection size-exclusion chromatography-based  
164 thermostability (FSEC-TS) assay (Hattori *et al.*, 2012) (Figure 3C, Table 1). However, the  $\text{Cl}^-$   
165 -dependent stabilization was not observed on T1r2a/T1r3 with the  $\text{Cl}^-$ -site mutation, T105A in  
166 T1r3. In the case of this mutant, the  $T_m$  values for both in the presence and absence of  $\text{Cl}^-$  was  
167 similar to the values obtained for the wild-type protein in the absence of  $\text{Cl}^-$  (Figure 3C,  
168 Figure 3—figure supplement 1, Table 1). These results indicate that the  $\text{Cl}^-$  effect attributed to  
169 the identical site where the  $\text{Cl}^-$ -binding was observed in the crystal structure of T1r3.

170         Next, we examined the consequence of the  $\text{Cl}^-$ -binding to T1r2a/T1r3LBD via  
171 Förster resonance energy transfer (FRET) using the fluorescent protein-fused sample. Class C  
172 GPCRs commonly exhibit agonist-induced conformational changes in LBD, such as the  
173 dimer rearrangement, which is essential for receptor activation and signaling (Ellaithy *et al.*,  
174 2020; Koehl *et al.*, 2019; Kunishima *et al.*, 2000; Lin *et al.*, 2021). Consistent with this, we  
175 previously reported that T1r2a/T1r3LBD shows conformational change concomitant with the  
176 binding of amino acids, which can be detected as increased FRET intensity (Nango *et al.*,  
177 2016). Notably, adding  $\text{Cl}^-$  to the fluorescent protein-fused T1r2a/T1r3LBD also increased  
178 FRET intensities, similar to amino acids (Figure 3D). The  $\text{EC}_{50}$  for  $\text{Cl}^-$ -induced FRET signal  
179 change was determined as  $\sim 1 \text{ mM}$  (Table 1). Note that both DSF and FRET estimations have  
180 some degree of error: the former produced slightly lower values than the latter, particularly in  
181 the case of weak affinities in the mM concentration range (Yoshida *et al.*, 2019). As such,  
182 although the  $\text{EC}_{50}$  value determined by FRET was slightly higher than the apparent  $K_d$  value  
183 of  $\text{Cl}^-$  determined by DSF, the two are most likely relevant. Considering that the  $\text{Cl}^-$ -binding  
184 site is located adjacent to the dimer interface, which exhibits reorientation upon agonist  
185 binding (Figure 2D), the results suggest that the  $\text{Cl}^-$  binding to T1r2a/T1r3LBD induces a



186 conformational rearrangement of T1r2a/T1r3LBD similar to its agonist amino acid.  
187 Nevertheless, the extent of the FRET change induced by  $\text{Cl}^-$  was smaller than the changes  
188 induced by amino acids, such as  $\sim 1/2$  of the latter (Figure 3E). Therefore, the results suggest  
189 that the extent of the conformational change induced by  $\text{Cl}^-$  is smaller than the change  
190 induced by amino acids. The extent of  $\text{Cl}^-$ -dependent FRET index change was reduced on  
191 T1r2a/T1r3 with the  $\text{Cl}^-$ -site mutation, T105A in T1r3 (Figure 3E). Considering that the  
192 amino-acid-dependent change in the mutant was also significantly reduced (Figure 3E), the  
193 T105A mutation on T1r3 might result in losing the ability of the conformational change  
194 induced by  $\text{Cl}^-$ - and amino-acid bindings, although the possibility of deactivation of the  
195 protein during preparation due to its low stability cannot be excluded.

196 In addition to the  $\text{Cl}^-$ -binding effect, the  $\text{Cl}^-$  effect on amino-acid binding to  
197 T1r2a/T1r3LBD was investigated by FRET and isothermal calorimetry (ITC). The  $K_d$  values  
198 for L-glutamine binding determined by ITC, as well as the  $\text{EC}_{50}$  values and the other  
199 parameters for L-glutamine-induced conformational change determined by FRET, did not  
200 differ in the presence and absence of  $\text{Cl}^-$  (Figure 3F, Figure 3—figure supplement 1, and  
201 Table 1). These results indicated that the  $\text{Cl}^-$  binding had no significant effect on the binding  
202 of L-glutamine, a representative taste substance, at least for T1r2a/T1r3LBD from medaka  
203 fish.

204

### 205 **Taste response to $\text{Cl}^-$ through T1rs in mouse**

206 Biophysical studies on T1r2a/T1r3LBD from medaka fish suggested that  $\text{Cl}^-$  binding to  
207 T1r3LBD induces a conformational change similar to that of an agonist without affecting  
208 agonist binding. As described above, the  $\text{Cl}^-$ -binding site is likely conserved among T1r3 in  
209 various species, such as those in mammals. Therefore, we analyzed single fiber responses  
210 from mouse chorda tympani nerve to investigate the physiological effect of  $\text{Cl}^-$  on taste

211 sensation. While conventional cell-based receptor assay systems are affected by changes in  
212 extracellular ionic components, the application of various solutions to the taste pore side of  
213 the taste buds projected to taste nerve systems, are transduced exclusively as “taste” signals,  
214 without inducing the other cellular responses derived from the ionic component changes in  
215 the surrounding environment.

216 We first identified nerve fibers that connect to T1r-expressing taste cells in  
217 wild-type (WT) mice, i.e., that receive taste information from cells likely possessing sweet  
218 (T1r2/T1r3) and umami (T1r1/T1r3) receptors (Yasumatsu *et al*, 2012). The identification was  
219 evidenced by responses to T1r agonists, such as sugars and amino acids, which were inhibited  
220 by gurmarin (Gur), a T1r-specific blocker (Daly *et al*, 2013; Margolskee *et al*, 2007;  
221 Ninomiya & Imoto, 1995; Ninomiya *et al*, 1999). Then, we examined the responses to  $\text{Cl}^-$  in  
222 these fibers. Remarkably, the fibers also exhibited responses induced by  $\text{Cl}^-$ , which was  
223 applied as a form of NMDG-Cl devoid of the known salty taste stimulant, sodium ion (Figure  
224 4A).  $\text{Cl}^-$ -induced impulse frequencies from the nerves increased in a concentration-dependent  
225 manner (Figure 4B). The responses to NMDG-Cl, NaCl, and KCl at the same concentrations  
226 did not differ significantly (repeated measures analysis of variance [ANOVA],  $P > 0.05$ ),  
227 whereas responses to NMDG-gluconate were significantly smaller than those to NMDG-Cl  
228 (repeated measures ANOVA:  $F_{(1, 43)} = 31.33$ ,  $P < 0.001$ ) and did not induce explicit responses  
229 up to 10 mM. These results confirmed that the observed responses were attributed to  $\text{Cl}^-$ . All  
230 responses to  $\text{Cl}^-$ , regardless of the type of counter cations, were significantly decreased by  
231 lingual treatment with Gur (Figure 4B, repeated measures ANOVA:  $F_{(1, 42)} = 56.65$ ,  $P < 0.001$   
232 for NMDG-Cl;  $F_{(1, 50)} = 24.78$ ,  $P < 0.001$  for NaCl; and  $F_{(1, 45)} = 35.72$ ,  $P < 0.001$  for KCl).  
233 Furthermore, responses to  $\text{Cl}^-$  in T1r3-KO mice were significantly lower than those in WT  
234 mice (repeated measures ANOVA:  $F_{(1, 43)} = 25.36$ ,  $P < 0.001$ ; Figure 4C). The results indicate  
235 that the observed  $\text{Cl}^-$ -dependent responses were mediated by T1r. Notably, the  $\text{Cl}^-$

236 -concentration range that induced nerve responses was lower ( $\leq \sim 10$  mM) than that for  
237  $\text{Na}^+$ -detection by ENaC when applied as the NaCl form ( $\geq \sim 30$  mM) (Chandrashekar *et al.*,  
238 2010) but is consistent with those for  $\text{Cl}^-$ -binding and  $\text{Cl}^-$ -induced conformational change  
239 observed on T1r2a/T1r3LBD (Table 1). These results suggest that a low  $\text{Cl}^-$  concentration is  
240 sensorily detected via T1r in taste buds. Although the responses induced by known taste  
241 substances for T1rs, such as sugars and amino acids, range from tens to hundreds of impulse  
242 frequencies per 10 s (Yasumatsu *et al.*, 2012); the maximum response level induced by  $\text{Cl}^-$   
243 was low,  $\sim 10$  per 10 s (Figure 4B). According to our observations,  $\text{Cl}^-$  likely produces a “light”  
244 taste sensation compared with other known taste substances.

245         Next, to examine the physiological interaction between a canonical taste substance  
246 for mouse T1r and  $\text{Cl}^-$ , we recorded responses to 20 mM L-glutamine or 100 mM sucrose  
247 from T1r1/T1r3- and T1r2/T1r3-expressing cells, respectively, with or without NMDG-Cl  
248 from the same T1r-connecting single fibers (Figure 4A). The concentrations for the taste  
249 substances were set to induce responses greater than the baseline but less than maximum. As  
250 shown in Figure 4D, the response to L-glutamine or sucrose increased significantly by adding  
251 10 mM NMDG-Cl (paired *t*-test,  $t_2 = 7.56$ ,  $p = 0.017$  for L-glutamine and  $t_2 = 5.05$ ,  $p = 0.037$   
252 for sucrose). We confirmed that these responses had been suppressed by a lingual treatment of  
253 Gur in the presence ( $t_2 = 6.73$ ,  $p = 0.021$  for L-glutamine and  $t_2 = 8.80$ ,  $p = 0.013$  for sucrose)  
254 or absence ( $t_2 = 8.32$ ,  $p = 0.014$  for L-glutamine and  $t_2 = 11.72$ ,  $p = 0.007$  for sucrose) of  
255 NMDG-Cl to a similar extent and a similar level to the responses in T1r3-KO mice. Moreover,  
256 the responses to the mixtures did not differ significantly from the summation of the responses  
257 to each solution ( $t_2 = 2.34$ ,  $p = 0.145$  for L-glutamine and  $t_2 = 2.31$ ,  $p = 0.147$  for sucrose).  
258 The results suggest that the simultaneous binding of  $\text{Cl}^-$  and a canonical taste substance, such  
259 as amino acids and sugars, to T1r do not cause synergistic responses.

260         Finally, we addressed whether T1r-mediated  $\text{Cl}^-$  responses observed in the taste

261 nerves involve taste perception. Thus far, most reported behavioral assays for examining the  
262 gustatory detection of NaCl were performed with concentrations above ~30 mM, which can  
263 induce ENaC-mediated responses. Nevertheless, a few reports have shown that NaCl solution  
264 induced higher consumption relative to water even below 10 mM concentration (Dyr *et al*,  
265 2014; Stewart *et al*, 1994), which is below the range inducing ENaC-mediated responses  
266 (Chandrashekar *et al.*, 2010) but within what we observed in the Cl<sup>-</sup>-induced taste nerve  
267 responses via T1r. For verification, we performed a mouse two-bottle choice test using  
268 NMDG-Cl solution and analyzed the preference relative to water. The mouse preferred water  
269 containing 10 mM NMDG-Cl, which was abolished by the application of Gur (Figure 4E, 4F).  
270 These results suggest that Cl<sup>-</sup> is preferably perceived through taste signal transduction  
271 mediated by T1r.

272

## 273 **Discussion**

274 In this study, Cl<sup>-</sup> is found to specifically interact with the LBD in T1r3, a common component  
275 of sweet and umami taste receptors, and induces a conformational change in the receptor's  
276 LBD region. The Cl<sup>-</sup> binding to T1r in taste cells is likely further transmitted to the sweet  
277 taste nervous system, resulting in a light yet preferable taste sensation. Since T1rs are  
278 conserved across vertebrates and the Cl<sup>-</sup>-binding site is likely conserved among T1r3 in  
279 various organisms, T1r-mediated Cl<sup>-</sup> responses might be common in many animals, such as  
280 humans. Evidently, the concentration range for the Cl<sup>-</sup>-induced conformational change of  
281 medaka T1r2a/T1r3LBD and increase in murine sweet nerve impulses observed in this study  
282 (i.e., ≤ ~10 mM) agrees with the NaCl concentration perceived as “sweet” by humans  
283 (Bartoshuk *et al.*, 1964; Bartoshuk *et al.*, 1978; Cardello, 1979) (Figure 1). Additionally, the  
284 sweet sensation induced by NaCl was reportedly suppressed by topical application of  
285 *Gymnema sylvestre* (Bartoshuk *et al.*, 1978), containing Gymnemic acids, which are specific

286 inhibitors of human sweet taste receptor T1r2/T1r3 (Sanematsu *et al.*, 2014). Overall, these  
287 results agree with the involvement of T1rs in the Cl<sup>-</sup>-taste detection. These findings agree  
288 with an earlier hypothesis by Bartoshuk and colleagues that dilute NaCl contains a sweet  
289 stimulus that interacts with the same receptor molecules as sucrose (Bartoshuk *et al.*, 1978).  
290 The reported “sweet” sensation by low NaCl concentration faded out at the concentrations  
291 detected as “salty” (Bartoshuk *et al.*, 1964; Bartoshuk *et al.*, 1978; Cardello, 1979), thereby  
292 agreeing with the fact that we might be unaware that table salt is sweet at such concentrations.  
293 The phenomenon could be explained by “mixture suppression” (Bartoshuk, 1975; Keast &  
294 Breslin, 2002; Stevens, 1996), such that a light sweet sensation is masked by an intense salty  
295 sensation in a higher concentration range of NaCl.

296         The Cl<sup>-</sup> perception at low salt concentrations found in this study is achieved via the  
297 T1rs-mediating taste system, which transduces information as a preferred taste by nature.  
298 Since Cl<sup>-</sup> is also a component of table salt, this system might serve as another pathway for  
299 preferred salt perception promoting intake along with the pathway for Na<sup>+</sup> perception as a  
300 preferred taste via taste cells that express the Na<sup>+</sup> receptor ENaC and a purinergic  
301 neurotransmission channel CALHM1/3 (Nomura *et al.*, 2020). In contrast, the T1r-mediated  
302 Cl<sup>-</sup>-sensing observed in this study shows several different properties from those of cells or the  
303 molecules reportedly exhibiting anion-sensitive Na<sup>+</sup> detection or Cl<sup>-</sup> detection in taste buds  
304 thus far. Specifically, the anion-sensitive Na<sup>+</sup>-responding taste cells reported by Lewandowski  
305 *et al.* are type 3 cells, which include sour- but not sweet-responding cells (Lewandowski *et al.*,  
306 2016). The Cl<sup>-</sup>-detection pathway reported by Roebber *et al.* was observed in type 2 cells,  
307 which include both sweet- and bitter-responding cells, but was inhibited by a blocker of  
308 phospholipase C, which mediates sweet- and bitter-signaling downstream of T1r and bitter  
309 receptors (Roebber *et al.*, 2019). The Cl<sup>-</sup>-responses mediated by TMC4 were observed in the  
310 glossopharyngeal nerve but not in the chorda tympani nerve wherein T1r-mediated responses

311 were observed (Kasahara *et al.*, 2021). Notably, responses by these reported pathways were  
312 tested by much higher concentrations of NaCl, typically in the several hundred mM range  
313 (Kasahara *et al.*, 2021; Lewandowski *et al.*, 2016; Roebber *et al.*, 2019), than those used in  
314 this study. These results imply that there may be multiple distinct concentration-dependent  
315 pathways for Cl<sup>-</sup> detection in taste buds. Given that high NaCl concentration is transduced as  
316 an aversive taste through bitter and sour taste cells (Oka *et al.*, 2013), the relevance between  
317 the reported high Cl<sup>-</sup>-responsive pathways and high NaCl responses by bitter and sour cells is  
318 of interest, as pointed out by the previous studies, and will require further investigation.

319           Salt taste sensation and natriuresis are critical physiological processes that regulate  
320 sodium intake and excretion to maintain body fluid homeostasis. Intriguingly, both processes  
321 were found to use the counter anion Cl<sup>-</sup> to regulate the molecular functions of the receptors,  
322 T1rs and ANPRs, which share a similar extracellular protein architecture with a conserved Cl<sup>-</sup>  
323 -binding site. In the case of ANPR, mGluRs, and CaSR, positive allosteric modulations by Cl<sup>-</sup>  
324 for agonist binding have been observed, with some variations in the extent of the  
325 enhancement (Eriksen & Thomsen, 1995; Kuang & Hampson, 2006; Liu *et al.*, 2020; Tora *et*  
326 *al.*, 2018; Tora *et al.*, 2015). Whether the Cl<sup>-</sup> actions on T1rs of other subtypes or from other  
327 organisms have some variance is yet to be examined.

328

## 329 **Materials and methods**

### 330 **Crystallography**

331 All protein samples used for structural and functional analyses were prepared using  
332 *Drosophila* S2 cells (Invitrogen) or high-expression clones for each protein sample  
333 established from S2 cells in previous studies (Nuemket *et al.*, 2017; Yamashita *et al.*, 2017).  
334 No authentication or test for mycoplasma contamination was performed.

335           The L-glutamine-bound T1r2a/T1r3LBD crystals, in complex with a crystallization

336 chaperone Fab16A, were prepared in the presence of NaCl as described (Nuemket *et al.*,  
337 2017). For the preparation of the Br<sup>-</sup>-substituted crystals, the obtained crystals were soaked in  
338 a mother liquor consisting of 100 mM MES-Tris, pH 6.0, 50 mM NaBr, 17% PEG1500, 5%  
339 PEG400, 5 mM L-glutamine, 2 mM CaCl<sub>2</sub>, cryoprotected by gradually increasing the  
340 concentration of glycerol to 10%, incubated for 2 hours, and flash-frozen.

341 The X-ray diffraction data were collected at the SPring-8 beamline BL41XU using  
342 a PILATUS6M detector (DECTRIS) at wavelength 0.9194 Å or at the Photon Factory  
343 beamline BL-1A using an EIGER X4M detector (DECTRIS) at wavelength 2.7 Å. The data  
344 were processed with XDS (Kabsch, 2010) (Figure 2—figure supplement 1). The phases for  
345 anomalous difference Fourier map calculation were obtained by molecular replacement  
346 methods with the program PHASER (McCoy *et al.*, 2007), using the structures of a single unit  
347 of the mT1r2a-3LBD-Fab16A complex (PDB ID: 5X2M; ligands and water models were  
348 removed) (Nuemket *et al.*, 2017) as the search model (the  $R/R_{\text{free}}$  of the model for the Br<sup>-</sup>-data  
349 collected at 0.9194 Å: 0.248/0.350; the Cl<sup>-</sup>-data collected at 2.7 Å: 0.233/0.339).

350

### 351 **Differential scanning fluorimetry (DSF)**

352 Differential scanning fluorimetry was performed as previously described (Yoshida *et al.*,  
353 2019). The purified mT1R2a/3LBD heterodimer protein was prepared (Nango *et al.*, 2016)  
354 and dialyzed with buffer A (20 mM HEPES-NaOH, 300 mM sodium gluconate, pH 7.5) to  
355 remove Cl<sup>-</sup>. 1 µg of the dialyzed protein sample was mixed with Protein Thermal Shift Dye  
356 (Applied Biosystems) and 0.003 – 10 mM NaCl in 20 µL of buffer A. The mixture solutions  
357 were then loaded to a MicroAmpR Fast Optical 48-Well Reaction Plate (Applied Biosystems).  
358 Fluorescent intensities were measured by the StepOne Real-Time PCR System (Applied  
359 Biosystems) while the temperature raised from 25 °C to 99 °C with a velocity of 0.022 °C/sec.  
360 For detection, the reporter and quencher were set as “ROX” and “none,” respectively. The

361 apparent melting transition temperature ( $T_m$ ) was determined using the maximum of the  
362 derivatives of the melt curve (dFluorescence/dT) by Protein Thermal Shift Software version  
363 1.3 (Applied Biosystems). The apparent dissociation constant ( $K_{d-app}$ ) for  $Cl^-$  derived from the  
364  $T_m$  values at different NaCl concentrations was estimated using a thermodynamic model  
365 proposed by Schellman (Schellman, 1975) as described (Yoshida *et al.*, 2019). The sample  
366 sizes for the analyses by DSF, as well as Förster resonance energy transfer and isothermal  
367 titration calorimetry described below, were set to obtain reliable values based on the  
368 experiences in the previous studies (Nango *et al.*, 2016; Nuemket *et al.*, 2017; Yoshida *et al.*,  
369 2019).

370

### 371 **Förster resonance energy transfer (FRET)**

372 FRET analysis was performed as described previously (Nango *et al.*, 2016; Nuemket *et al.*,  
373 2017). The WT T1r2aLBD-Cerulean and T1r3LBD-Venus fusion heterodimer proteins were  
374 prepared as described (Nuemket *et al.*, 2017). For the mutant protein preparation, a  
375 T1r3-T105A mutation was introduced into the vector pAc-mfT1r3aL-Ve (Nango *et al.*, 2016)  
376 using polymerase chain reaction. The mutant expression vector was co-introduced with  
377 pAc-mfT1r2aL-Ce (Nango *et al.*, 2016) to *Drosophila* S2 cells using Polyethyleneimine (PEI)  
378 “MAX” (Polysciences) as previously described (Bleckmann *et al.*, 2019) with a ratio of 0.5  $\mu$ g  
379 pAc-mfT1r2aL-Ce, 0.5- $\mu$ g pAc- mfT1r3aL-Ve-T105A, and 10- $\mu$ g PEI to  $\sim 1 \times 10^6$  cells.  
380 Protein expression and purification were conducted similarly as for the WT protein.

381 For the  $Cl^-$ -titration, the purified protein samples were dialyzed against buffer A in  
382 the presence of 1-mM L-alanine. Afterward, the samples were diluted with buffer A to reduce  
383 the remaining L-alanine concentration below 1  $\mu$ M ( $< \sim 1/100$  of  $EC_{50}$  (Nango *et al.*, 2016;  
384 Nuemket *et al.*, 2017)), and then incubated in the presence of 0.001–10 mM NaCl or 1 mM  
385 L-glutamine in buffer A at 4°C overnight. For L-glutamine titration in the presence or absence



386 of  $\text{Cl}^-$ , the protein solution was dialyzed with buffer B (20 mM HEPES-Tris, 300 mM NaCl,  
387 pH 7.5) or buffer C (20 mM HEPES-Tris, 300 mM sodium gluconate, pH 7.5) in the presence  
388 of 1 mM L-alanine to prepare the conditions with or without  $\text{Cl}^-$ , respectively. Then, the  
389 samples were diluted with buffer B or C to reduce the remaining L-alanine concentration  
390 below 1  $\mu\text{M}$  and then incubated in the presence of 0.01–1000  $\mu\text{M}$  L-glutamine at 4°C  
391 overnight. Fluorescence spectra were recorded at 298 K with a FluoroMax4  
392 spectrofluorometer (Horiba). The sample was excited at 433 nm, and FRET was detected via  
393 the emission at 526 nm. The emission at 475 nm was also recorded for the FRET index  
394 calculation. The FRET index (intensity at 526 nm/intensity at 475 nm) was plotted against the  
395  $\text{Cl}^-$  or L-glutamine concentration, and the titration curves were fitted to the Hill equation using  
396 KaleidaGraph (Synergy Software) or ORIGIN (OriginLab).

397

#### 398 **Isothermal titration calorimetry**

399 In order to prepare the conditions with or without  $\text{Cl}^-$ , the purified mFT1R2a/3LBD  
400 heterodimer protein was dialyzed with buffers B or C, respectively. The dialyzed protein  
401 solution (~50  $\mu\text{M}$ ) was then loaded into the sample cell in iTC200 (GE Healthcare) after the  
402 removal of insoluble materials by centrifugation (10,000×g, 15 min, 277 K). The titration was  
403 performed by injecting 2  $\mu\text{L}$  of 400  $\mu\text{M}$  L-glutamine at intervals of 120 s at 298 K. The  
404 thermograms and the binding isotherms were analyzed with Origin software, assuming one  
405 set of binding sites for fitting.

406

#### 407 **Fluorescence-detection size-exclusion chromatography-based thermostability assay** 408 **(FSEC-TS)**

409 A T1r3-T105A mutation was introduced in the vector pAc\_mFT1r3L (Yamashita *et al.*, 2017)  
410 by PCR. The mutant expression vector was co-introduced with pAc\_mft1r2aL (Yamashita *et*

411 *al.*, 2017) to *Drosophila* S2 cells to establish a stable high-expression clone cell as previously  
412 described (Yamashita *et al.*, 2017). The wild-type T1r2a/T1r3LBD and mutant  
413 T1r2a/T1r3-105A-LBD proteins were expressed and purified as previously described (Nango  
414 *et al.*, 2016) with several modifications as listed below. After the protein binding to  
415 ANTI-FLAG M2 affinity gel, the resin was washed with either buffer D (20 mM  
416 HEPES-NaOH, 0.3 M NaCl, 2 mM CaCl<sub>2</sub>, 5 mM L-Gln, pH 7.5) or buffer E (20 mM  
417 HEPES-NaOH, 0.3 M Na gluconate, 2 mM Ca gluconate, 5 mM L-Gln, pH 7.5). Then, the  
418 protein was eluted with 100 µg/mL FLAG peptide in buffer D or E.

419 The protein solutions (50 µg/mL) in buffer D or E were incubated at 4 °C, 37 °C,  
420 50 °C, 70 °C, or 90 °C at 2 hours. Subsequently, the samples were loaded on an SEC-5  
421 column, 500 Å, 4.6 × 300 mm (Agilent) connected to a Prominence HPLC system (Shimadzu),  
422 using buffer D or E as a running buffer at a flow rate of 0.3 ml min<sup>-1</sup>. The elution profiles  
423 were detected with an RF-20A fluorometer (Shimadzu), using excitation and emission  
424 wavelengths of 280 and 340 nm for the detection of intrinsic tryptophan fluorescence.

425 The residual ratio after incubation at each temperature was estimated using the  
426 fluorescence intensity at the elution peak, which corresponded to the T1rLBD dimer, *i.e.*, the  
427 peak height at ~11.6 min. The values were normalized to the intensity of the sample incubated  
428 at 4 °C as 1. In order to estimate the apparent melting temperature ( $T_{m-app}$ ) of the sample, the  
429 values of residual ratio at each temperature were fitted to the Gibbs-Helmholtz equation  
430 transformed as shown below (assuming that the sample protein is under equilibrium between  
431 a folding and unfolding state under each condition):

$$Residual\ ratio = 1 - \frac{1}{1 + \exp \left[ \frac{\Delta H \left( 1 + \frac{T}{T_{m-app}} \right) - \Delta C_p \left\{ (T_{m-app} - T) + T \ln \left( \frac{T}{T_{m-app}} \right) \right\}}{RT} \right]}$$

432 where  $\Delta H$  and  $\Delta C_p$  are the enthalpy and heat capacity change of unfolding, respectively;  $T$  is  
433 the temperature of the sample incubation;  $R$  is the gas constant. The fittings were performed

434 with KaleidaGraph (Synergy Software), with  $\Delta H$ ,  $\Delta C_p$ , and  $T_{m-app}$  are set as valuables.

435

### 436 **Single fiber recording from mouse chorda tympani (CT) nerve**

437 All animal experiments were conducted following the National Institutes of Health Guide for  
438 the Care and Use of Laboratory Animals and approved by the committee for Laboratory  
439 Animal Care and Use and the local ethics committee at Tokyo Dental College (Permit  
440 Number: 228101) and Okayama University (Permit Number: OKU-2022897) Japan. The  
441 subjects were six adult male C57BL/6JCrj mice (Charles River Japan, Tokyo, Japan) and four  
442 T1r3GFP-KO mice, which were obtained by mating T1r3-GFP (Damak *et al*, 2008) and  
443 T1r3-KO (Damak *et al*, 2003) mice. Mice were maintained on a 12/12-h light/dark cycle and  
444 fed standard rodent chow and 8–20 weeks of age ranging in weight from 20 g to 30 g.

445 The mice were anesthetized with an injection of combination anesthetic agents  
446 contained midazolam (0.8 mL/kg, Sandoz, Yamagata, Japan), medetomidine (0.75 mL/kg,  
447 Nippon Zenyaku Kogyo Co., Fukushima, Japan), butorphanol tartrate (1 mL/kg, Meiji Seika  
448 Pharma, Tokyo, Japan) and physiologic saline (7.45 mL/kg), and maintained at a surgical  
449 level of anaesthesia, with additional injections of sodium pentobarbital (Nakarai Tesque,  
450 Kyoto, Japan, 8–10 mg/kg ip every hour). Under anaesthesia, each mouse was fixed in the  
451 supine position with a head holder, and the trachea cannulated. The right CT nerve was  
452 dissected, free from surrounding tissues, after the removal of the pterygoid muscle and cut at  
453 the point of its entry to the tympanic bulla. A single or a few nerve fibers were teased apart  
454 with a pair of needles and lifted onto an Ag-AgCl electrode, and an indifferent electrode was  
455 placed in nearby tissue. Their neural activities were amplified (K-1; Iyodenshikagaku,  
456 Nagoya, Japan) and recorded on a computer using a PowerLab system (PowerLab/sp4; AD  
457 Instruments, Bella Vista, NSW, Australia). For taste stimulation of fungiform papillae, the  
458 anterior half of the tongue was enclosed in a flow chamber. Taste solutions or rinses (distilled

459 water) (~24 °C) were delivered to the tongue by gravity flow at the same flow rate (~0.1 mL  
460 s<sup>-1</sup>). For data analysis, we used the net average frequency for 10 sec after the stimulus onset,  
461 which was obtained by subtracting the spontaneous frequency for the 10 sec duration before  
462 stimulation from after stimulation. In the initial survey to identify a nerve fiber connecting to  
463 T1r-expressing cells, test stimuli such as 100 mM NaCl, 10 mM HCl, 500 mM sucrose, 100  
464 mM monopotassium glutamate, 20 mM quinine HCl were separately applied. If the fiber  
465 responded to sucrose, we applied 10 μM–100 mM NMDG-Cl, NaCl, KCl, or either of 20 mM  
466 L-glutamine or 100 mM sucrose with or without 10 mM NMDG-Cl to the tongue. The criteria  
467 for the occurrence of response were the following: the number of spikes was larger than the  
468 mean + two standard deviations of the spontaneous discharge for three 10 sec periods before  
469 stimulation, and at least three spikes were evoked by taste stimulation (Yasumatsu *et al.*,  
470 2012). In the case of T1r3GFP-KO mice, as the mice showed a significant response to 0.5 M  
471 sucrose, we could identify sweet-responsive fibers (impulse frequency of  $13.4 \pm 1.31$ )  
472 (Yasumatsu *et al.*, 2012). The reagents used were purchased from Wako Pure Chemical  
473 Industries (Osaka, Japan; others). To block responses via T1r (Daly *et al.*, 2013; Margolskee  
474 *et al.*, 2007; Ninomiya & Imoto, 1995; Ninomiya *et al.*, 1999), each tongue was treated with  
475 30 μg ml<sup>-1</sup> (~7 μM) gurmarin (Gur) dissolved in 5 mM phosphate buffer (pH 6.8) for 10 min,  
476 similarly as described by Ninomiya & Imoto (Ninomiya & Imoto, 1995). To assure the  
477 detection of responses from T1r-expressing cells, recordings from Gur-insensitive  
478 sweet-responsive fibers were defined as those retaining impulse frequencies to 0.5 M sucrose  
479 more than 60% after the Gur treatment (Ninomiya *et al.*, 1999) were excluded from the data.  
480 The number of Gur-sensitive and Gur-insensitive fibers were six and three, respectively,  
481 among 0.5 M sucrose responding fibers. The sucrose application was repeated 3–6 times  
482 during the recordings. Additionally, the recovery of the suppressed responses was confirmed  
483 using 15 mM β-cyclodextrin, which could remove the effect of Gur from the tongue

484 (Ninomiya *et al.*, 1999). All Gur-sensitive fibers recovered up to 60%–150% of responses  
485 before Gur. At the end of the experiment, animals were killed by administering an overdose of  
486 the anaesthetic. Repeated measures ANOVA and Student's paired *t*-test were used to  
487 statistically evaluate the effects of chemicals or gene deletion. The sample size was calculated  
488 according to power analysis, thereby resulting in three per group due to the effect size (*d*) of  
489 6–9.3 to detect the effects of blocking or deleting T1r3.

490

#### 491 **Two-bottle preference tests**

492 All training and testing sessions occurred during the light phase of the light/dark cycle. On the  
493 first day of training, the WT mice (adult male C57BL/6JCrj) were water deprived for 23 h and  
494 then placed in a test box with two bottles: one filled with water and the other empty. The  
495 amount of fluid intake was measured after a 5 min presentation. After 4 days of training, mice  
496 were used for test sessions if they drank water evenly on either side (nine mice). In the test  
497 sessions, they were provided with two bottles, one containing 10 mM NMDG-Cl and the  
498 other containing water, with or without Gur, for 5 min. The amount of liquid consumed was  
499 measured by weighing the bottles, and a preference score of NMDG-Cl was calculated using  
500 the following equation:

$$Preference\ score(\%) = \frac{V_{Cl}}{V_{Cl} + V_w} \times 100$$

501 where  $V_{Cl}$  and  $V_w$  are the amount of NMDG-Cl intake and water intake, respectively.

502

#### 503 **Acknowledgments**

504 We thank Drs. Kazuya Hasegawa, Nobuhiro Mizuno, Naohiro Matsugaki for help with X-ray  
505 data collection; Junya Nitta and Hikaru Ishida for help with protein preparation; Ryusuke  
506 Yoshida for help with the single fiber recording; Yuko Kusakabe for attempt at cell-based  
507 receptor assay in the early stage of the study; Haruo Ogawa for sharing knowledge about

508 ANPR; Yuzo Ninomiya for valuable discussions. We also thank the reviewers of BioPhysics  
509 Colab for their helpful comments and Enago ([www.enago.jp](http://www.enago.jp)) for the English language review.  
510 The synchrotron radiation experiments at the BL41XU, SPring-8 were performed with  
511 approvals of the Japan Synchrotron Radiation Research Institute (JASRI) (Proposal No.  
512 2016B2534). The synchrotron radiation experiment at the BL-1A, Photon Factory was  
513 supported by the Platform for Drug Discovery, Informatics, and Structural Life Science  
514 (Proposal No. 1264). This work was financially supported by JSPS KAKENHI Grant  
515 Numbers JP17H03644, JP18H04621, JP20H03195, JP20H04778, JP21H05524 (to A.Y.) and  
516 JP20H03855, JP20K02415 (to K.Y.), Mishima Kaiun Memorial Foundation, and the Salt  
517 Science Research Foundation (Proposal No. 2039) (to A.Y.).

518

#### 519 **Competing interests**

520 The authors declare that they have no conflict of interest.

521

#### 522 **References**

523 Bartoshuk LM (1975) Taste mixtures: is mixture suppression related to compression? *Physiol*  
524 *Behav* 14: 643-649

525 Bartoshuk LM, McBurney DH, Pfaffmann C (1964) Taste of Sodium Chloride Solutions after  
526 Adaptation to Sodium Chloride: Implications for the "Water Taste". *Science* 143: 967-968

527 Bartoshuk LM, Murphy C, Cleveland CT (1978) Sweet taste of dilute NaCl: psychophysical  
528 evidence for a sweet stimulus. *Physiol Behav* 21: 609-613

529 Bleckmann M, Schurig M, Endres M, Samuels A, Gebauer D, Konisch N, van den Heuvel J  
530 (2019) Identifying parameters to improve the reproducibility of transient gene expression in  
531 High Five cells. *PLoS One* 14: e0217878

532 Cardello AV (1979) Taste quality changes as a function of salt concentration in single human

- 533 taste papillae. *Chem Senses* 4: 1-13
- 534 Chandrashekar J, Kuhn C, Oka Y, Yarmolinsky DA, Hummler E, Ryba NJ, Zuker CS (2010)
- 535 The cells and peripheral representation of sodium taste in mice. *Nature* 464: 297-301
- 536 Daly K, Al-Rammahi M, Moran A, Marcello M, Ninomiya Y, Shirazi-Beechey SP (2013)
- 537 Sensing of amino acids by the gut-expressed taste receptor T1R1-T1R3 stimulates CCK
- 538 secretion. *Am J Physiol Gastrointest Liver Physiol* 304: G271-282
- 539 Damak S, Mosinger B, Margolskee RF (2008) Transsynaptic transport of wheat germ
- 540 agglutinin expressed in a subset of type II taste cells of transgenic mice. *BMC Neurosci* 9: 96
- 541 Damak S, Rong M, Yasumatsu K, Kokrashvili Z, Varadarajan V, Zou S, Jiang P, Ninomiya Y,
- 542 Margolskee RF (2003) Detection of sweet and umami taste in the absence of taste receptor
- 543 T1r3. *Science* 301: 850-853
- 544 Dyr W, Wyszogrodzka E, Mierzejewski P, Bienkowski P (2014) Drinking of flavored
- 545 solutions by high preferring (WHP) and low preferring (WLP) alcohol-drinking rats.
- 546 *Pharmacol Rep* 66: 28-33
- 547 Ellaithy A, Gonzalez-Maeso J, Logothetis DA, Levitz J (2020) Structural and Biophysical
- 548 Mechanisms of Class C G Protein-Coupled Receptor Function. *Trends Biochem Sci* 45:
- 549 1049-1064
- 550 Eriksen L, Thomsen C (1995) [3H]-L-2-amino-4-phosphonobutyrate labels a metabotropic
- 551 glutamate receptor, mGluR4a. *Br J Pharmacol* 116: 3279-3287
- 552 Hattori M, Hibbs RE, Gouaux E (2012) A fluorescence-detection size-exclusion
- 553 chromatography-based thermostability assay for membrane protein precrystallization
- 554 screening. *Structure* 20: 1293-1299
- 555 Kabsch W (2010) Xds. *Acta Crystallogr D Biol Crystallogr* 66: 125-132
- 556 Kasahara Y, Narukawa M, Ishimaru Y, Kanda S, Umatani C, Takayama Y, Tominaga M, Oka
- 557 Y, Kondo K, Kondo T *et al* (2021) TMC4 is a novel chloride channel involved in

558 high-concentration salt taste sensation. *J Physiol Sci* 71: 23

559 Keast RS, Breslin PA (2002) An overview of binary taste–taste interactions. *Food Quality and*  
560 *Preference* 14: 111-124

561 Koehl A, Hu H, Feng D, Sun B, Zhang Y, Robertson MJ, Chu M, Kobilka TS, Laeremans T,  
562 Steyaert J *et al* (2019) Structural insights into the activation of metabotropic glutamate  
563 receptors. *Nature* 566: 79-84

564 Kuang D, Hampson DR (2006) Ion dependence of ligand binding to metabotropic glutamate  
565 receptors. *Biochem Biophys Res Commun* 345: 1-6

566 Kunishima N, Shimada Y, Tsuji Y, Sato T, Yamamoto M, Kumasaka T, Nakanishi S, Jingami  
567 H, Morikawa K (2000) Structural basis of glutamate recognition by a dimeric metabotropic  
568 glutamate receptor. *Nature* 407: 971-977

569 Lewandowski BC, Sukumaran SK, Margolskee RF, Bachmanov AA (2016)  
570 Amiloride-Insensitive Salt Taste Is Mediated by Two Populations of Type III Taste Cells with  
571 Distinct Transduction Mechanisms. *J Neurosci* 36: 1942-1953

572 Li X, Staszewski L, Xu H, Durick K, Zoller M, Adler E (2002) Human receptors for sweet  
573 and umami taste. *Proc Natl Acad Sci U S A* 99: 4692-4696

574 Lin S, Han S, Cai X, Tan Q, Zhou K, Wang D, Wang X, Du J, Yi C, Chu X *et al* (2021)  
575 Structures of Gi-bound metabotropic glutamate receptors mGlu2 and mGlu4. *Nature* 594:  
576 583-588

577 Liu H, Yi P, Zhao W, Wu Y, Acher F, Pin JP, Liu J, Rondard P (2020) Illuminating the  
578 allosteric modulation of the calcium-sensing receptor. *Proc Natl Acad Sci U S A* 117:  
579 21711-21722

580 Margolskee RF, Dyer J, Kokrashvili Z, Salmon KS, Ilegems E, Daly K, Maillet EL, Ninomiya  
581 Y, Mosinger B, Shirazi-Beechey SP (2007) T1R3 and gustducin in gut sense sugars to  
582 regulate expression of Na<sup>+</sup>-glucose cotransporter 1. *Proc Natl Acad Sci U S A* 104:



583 15075-15080

584 McCoy AJ, Grosse-Kunstleve RW, Adams PD, Winn MD, Storoni LC, Read RJ (2007) Phaser  
585 crystallographic software. *J Appl Crystallogr* 40: 658-674

586 Misono KS (2000) Atrial natriuretic factor binding to its receptor is dependent on chloride  
587 concentration: A possible feedback-control mechanism in renal salt regulation. *Circ Res* 86:  
588 1135-1139

589 Monn JA, Prieto L, Taboada L, Hao J, Reinhard MR, Henry SS, Beadle CD, Walton L, Man T,  
590 Rudyk H *et al* (2015a) Synthesis and Pharmacological Characterization of  
591 C4-(Thiotriazolyl)-substituted-2-aminobicyclo[3.1.0]hexane-2,6-dicarboxylates.  
592 Identification of  
593 (1R,2S,4R,5R,6R)-2-Amino-4-(1H-1,2,4-triazol-3-ylsulfanyl)bicyclo[3.1.0]hexane-2,  
594 6-dicarboxylic Acid (LY2812223), a Highly Potent, Functionally Selective mGlu2 Receptor  
595 Agonist. *J Med Chem* 58: 7526-7548

596 Monn JA, Prieto L, Taboada L, Pedregal C, Hao J, Reinhard MR, Henry SS, Goldsmith PJ,  
597 Beadle CD, Walton L *et al* (2015b) Synthesis and pharmacological characterization of  
598 C4-disubstituted analogs of 1S,2S,5R,6S-2-aminobicyclo[3.1.0]hexane-2,6-dicarboxylate:  
599 identification of a potent, selective metabotropic glutamate receptor agonist and determination  
600 of agonist-bound human mGlu2 and mGlu3 amino terminal domain structures. *J Med Chem*  
601 58: 1776-1794

602 Nango E, Akiyama S, Maki-Yonekura S, Ashikawa Y, Kusakabe Y, Krayukhina E, Maruno T,  
603 Uchiyama S, Nuemket N, Yonekura K *et al* (2016) Taste substance binding elicits  
604 conformational change of taste receptor T1r heterodimer extracellular domains. *Sci Rep* 6:  
605 25745

606 Nelson G, Chandrashekar J, Hoon MA, Feng L, Zhao G, Ryba NJ, Zuker CS (2002) An  
607 amino-acid taste receptor. *Nature* 416: 199-202

- 608 Nelson G, Hoon MA, Chandrashekar J, Zhang Y, Ryba NJ, Zuker CS (2001) Mammalian  
609 sweet taste receptors. *Cell* 106: 381-390
- 610 Ninomiya Y, Imoto T (1995) Gurmarin inhibition of sweet taste responses in mice. *Am J*  
611 *Physiol* 268: R1019-1025
- 612 Ninomiya Y, Imoto T, Sugimura T (1999) Sweet taste responses of mouse chorda tympani  
613 neurons: existence of gurmarin-sensitive and -insensitive receptor components. *J*  
614 *Neurophysiol* 81: 3087-3091
- 615 Nomura K, Nakanishi M, Ishidate F, Iwata K, Taruno A (2020) All-Electrical  
616 Ca(2+)-Independent Signal Transduction Mediates Attractive Sodium Taste in Taste Buds.  
617 *Neuron* 106: 816-829 e816
- 618 Nuemket N, Yasui N, Kusakabe Y, Nomura Y, Atsumi N, Akiyama S, Nango E, Kato Y,  
619 Kaneko MK, Takagi J *et al* (2017) Structural basis for perception of diverse chemical  
620 substances by T1r taste receptors. *Nat Commun* 8: 15530
- 621 Ogawa H, Qiu Y, Ogata CM, Misono KS (2004) Crystal structure of hormone-bound atrial  
622 natriuretic peptide receptor extracellular domain: rotation mechanism for transmembrane  
623 signal transduction. *J Biol Chem* 279: 28625-28631
- 624 Ogawa H, Qiu Y, Philo JS, Arakawa T, Ogata CM, Misono KS (2010) Reversibly bound  
625 chloride in the atrial natriuretic peptide receptor hormone-binding domain: possible allosteric  
626 regulation and a conserved structural motif for the chloride-binding site. *Protein Sci* 19:  
627 544-557
- 628 Oike H, Nagai T, Furuyama A, Okada S, Aihara Y, Ishimaru Y, Marui T, Matsumoto I, Misaka  
629 T, Abe K (2007) Characterization of ligands for fish taste receptors. *J Neurosci* 27: 5584-5592
- 630 Oka Y, Butnaru M, von Buchholtz L, Ryba NJ, Zuker CS (2013) High salt recruits aversive  
631 taste pathways. *Nature* 494: 472-475
- 632 Roebber JK, Roper SD, Chaudhari N (2019) The Role of the Anion in Salt (NaCl) Detection

633 by Mouse Taste Buds. *J Neurosci* 39: 6224-6232

634 Roper SD (2015) The taste of table salt. *Pflugers Arch* 467: 457-463

635 Sanematsu K, Kusakabe Y, Shigemura N, Hirokawa T, Nakamura S, Imoto T, Ninomiya Y  
636 (2014) Molecular mechanisms for sweet-suppressing effect of gymnemic acids. *J Biol Chem*  
637 289: 25711-25720

638 Schellman JA (1975) Macromolecular Binding. *Biopolymers* 14: 999-1018

639 Stevens JC (1996) Detection of tastes in mixture with other tastes: issues of masking and  
640 aging. *Chem Senses* 21: 211-221

641 Stewart RB, Russell RN, Lumeng L, Li TK, Murphy JM (1994) Consumption of sweet, salty,  
642 sour, and bitter solutions by selectively bred alcohol-preferring and alcohol-nonpreferring  
643 lines of rats. *Alcohol Clin Exp Res* 18: 375-381

644 Taruno A, Nomura K, Kusakizako T, Ma Z, Nureki O, Foskett JK (2021) Taste transduction  
645 and channel synapses in taste buds. *Pflugers Arch* 473: 3-13

646 Tora AS, Rovira X, Cao AM, Cabaye A, Olofsson L, Malhaire F, Scholler P, Baik H, Van  
647 Eeckhaut A, Smolders I *et al* (2018) Chloride ions stabilize the glutamate-induced active state  
648 of the metabotropic glutamate receptor 3. *Neuropharmacology* 140: 275-286

649 Tora AS, Rovira X, Dione I, Bertrand HO, Brabet I, De Koninck Y, Doyon N, Pin JP, Acher F,  
650 Goudet C (2015) Allosteric modulation of metabotropic glutamate receptors by chloride ions.  
651 *FASEB J* 29: 4174-4188

652 van den Akker F, Zhang X, Miyagi M, Huo X, Misono KS, Yee VC (2000) Structure of the  
653 dimerized hormone-binding domain of a guanylyl-cyclase-coupled receptor. *Nature* 406:  
654 101-104

655 Yamashita A, Nango E, Ashikawa Y (2017) A large-scale expression strategy for multimeric  
656 extracellular protein complexes using *Drosophila* S2 cells and its application to the  
657 recombinant expression of heterodimeric ligand-binding domains of taste receptor. *Protein Sci*

658 26: 2291-2301

659 Yasumatsu K, Ogiwara Y, Takai S, Yoshida R, Iwatsuki K, Torii K, Margolskee RF, Ninomiya

660 Y (2012) Umami taste in mice uses multiple receptors and transduction pathways. *J Physiol*

661 590: 1155-1170

662 Ye Q, Heck GL, DeSimone JA (1991) The anion paradox in sodium taste reception: resolution

663 by voltage-clamp studies. *Science* 254: 724-726

664 Yoshida T, Yasui N, Kusakabe Y, Ito C, Akamatsu M, Yamashita A (2019) Differential

665 scanning fluorimetric analysis of the amino-acid binding to taste receptor using a model

666 receptor protein, the ligand-binding domain of fish T1r2a/T1r3. *PLoS One* 14: e0218909

667 Zhang C, Zhang T, Zou J, Miller CL, Gorkhali R, Yang JY, Schilmiller A, Wang S, Huang K,

668 Brown EM *et al* (2016) Structural basis for regulation of human calcium-sensing receptor by

669 magnesium ions and an unexpected tryptophan derivative co-agonist. *Sci Adv* 2: e1600241

670 Zhang F, Klebansky B, Fine RM, Xu H, Pronin A, Liu H, Tachdjian C, Li X (2008) Molecular

671 mechanism for the umami taste synergism. *Proc Natl Acad Sci U S A* 105: 20930-20934

672

673 **Table 1.** Properties of the Cl<sup>-</sup>-binding to T1r2a/T1r3LBD.

| Cl <sup>-</sup> -binding, DSF ( <i>n</i> = 4)   |                                 |                                 |
|-------------------------------------------------|---------------------------------|---------------------------------|
| <i>K</i> <sub>d-app</sub> (mM)                  | 0.111 ± 0.046                   |                                 |
| Protein thermal stability, DSF ( <i>n</i> = 6)  |                                 |                                 |
| condition                                       | +Cl <sup>-</sup>                | -Cl <sup>-</sup>                |
| Melting temperature (°C)                        | 55.2 ± 0.03                     | 46.6 ± 0.06                     |
| Protein thermal stability, FSEC-TS              |                                 |                                 |
| wild type T1r2a/T1r3LBD ( <i>n</i> = 3)         |                                 |                                 |
| condition                                       | +Cl <sup>-</sup>                | -Cl <sup>-</sup>                |
| Melting temperature (°C)                        | 56.4 ± 5.1                      | 46.0 ± 0.3                      |
| mutant T1r2a/T1r3-T105ALBD                      |                                 |                                 |
| condition                                       | +Cl <sup>-</sup>                | -Cl <sup>-</sup>                |
| Melting temperature (°C)                        | 42.7 ± 0.1                      | 46.7 ± 0.7                      |
| Cl <sup>-</sup> - binding, FRET ( <i>n</i> = 3) |                                 |                                 |
| FRET index minimum                              | 1.00 ± 0.005                    |                                 |
| FRET index change                               | 0.119 ± 0.014                   |                                 |
| EC <sub>50</sub> (mM)*                          | 1.23 ± 0.53                     |                                 |
| L-glutamine binding, FRET ( <i>n</i> = 3)       |                                 |                                 |
| condition                                       | +Cl <sup>-</sup>                | -Cl <sup>-</sup>                |
| FRET index minimum                              | 1.08 ± 0.01                     | 0.86 ± 0.01                     |
| FRET index change                               | 0.11                            | 0.17                            |
| EC <sub>50</sub> (μM)                           | 3.78 ± 1.29                     | 3.87 ± 1.76                     |
| Hill coefficient                                | 1.20 ± 0.88                     | 0.94 ± 0.29                     |
| L-glutamine binding, ITC                        |                                 |                                 |
| condition                                       | +Cl <sup>-</sup>                | -Cl <sup>-</sup>                |
| <i>N</i> (sites)                                | 0.389 ± 0.028                   | 0.303 ± 0.023                   |
| <i>K</i> <sub>a</sub> (M <sup>-1</sup> )        | (2.85 ± 0.65) × 10 <sup>5</sup> | (2.12 ± 0.46) × 10 <sup>5</sup> |
| [converted to <i>K</i> <sub>d</sub> (μM)]       | [3.51]                          | [4.72]                          |
| Δ <i>H</i> (kcal/mol)                           | -12.3 ± 1.2                     | -12.9 ± 1.3                     |
| Δ <i>S</i> (cal/mol/deg)                        | -16.3                           | -18.8                           |

674 \*Hill coefficient was fixed to 1 for fitting.

675

676 **Figure legends**

677 **Figure 1**

678 **Salt taste sensation.**

679 Approximate concentration ranges of salt taste perceptions in humans (Bartoshuk *et al.*, 1978)  
680 and qualities of taste sensation with known cells and receptors responsible for their sensing  
681 are summarized.

682

683 **Figure 2**

684 **Cl<sup>-</sup>-binding sites in the medaka fish taste receptor T1r2a/T1r3LBD.**

685 (A) Schematic drawing of the overall architecture of T1r2a/T1r3. The crystal structure (PDB  
686 ID: 5X2M) (Nuemket *et al.*, 2017) is shown at the LBD region, and helices B and C in T1r3  
687 are labeled. (B) Anomalous difference Fourier map (4.5  $\sigma$ , red) of the Br<sup>-</sup>-substituted  
688 T1r2a/T1r3LBD crystal. (C) Anomalous difference Fourier map (4.5  $\sigma$ , red) of the Cl<sup>-</sup>-bound  
689 T1r2a/T1r3LBD crystal derived from the diffraction data collected at the wavelength of 2.7 Å.  
690 In panels B and C, the site originally identified the Cl<sup>-</sup>-binding was framed. (D) A close-up  
691 view of the Cl<sup>-</sup>-binding site in T1r3LBD in the Cl<sup>-</sup>-bound T1r2a/T1r3LBD (PDB ID: 5X2M).  
692 (E) Amino-acid sequence alignment of T1r proteins and the related receptors at the Cl<sup>-</sup>  
693 -binding site. The “h,” “m,” and “mf” prefixes to T1rs indicate human, mouse, and medaka  
694 fish, respectively. The position corresponding to Thr105 in T1r3 from medaka fish is  
695 highlighted. (F) The structures of ANPR (PDB ID: 1T34, left) (Ogawa *et al.*, 2004) and  
696 mGluR2 (PDB ID: 5CNI, right) (Monn *et al.*, 2015a) bound with Cl<sup>-</sup>. (G) Superposition of the  
697 Cl<sup>-</sup>-binding site in T1r3, ANPR, and mGluR2.

698

699 **Figure 2—figure supplement 1**

700 **X-ray data collection statistics of T1r2a/T1r3LBD-Fab16A complex.**

701

702 **Figure 2—figure supplement 2**

703 **The structure of the regions relating to the Cl<sup>-</sup>-binding site in medaka fish**  
704 **T1r2a/T1r3LBD.**

705 (A) The Br<sup>-</sup>-binding site in T1r3. The anomalous difference Fourier map (4.5  $\sigma$ , red) of the  
706 Br<sup>-</sup>-substituted crystal is overlaid to the Cl<sup>-</sup>-bound T1r2a/T1r3LBD structure (PDB ID:  
707 5X2M). (B) The Cl<sup>-</sup>-binding site in T1r3. The anomalous difference Fourier map (4.5  $\sigma$ , red)  
708 calculated from the data collected at the wavelength of 2.7 Å is overlaid. (C) The region in  
709 T1r2a, which corresponds to the Cl<sup>-</sup>-binding site in T1r3, in the Cl<sup>-</sup>-bound T1r2a/T1r3LBD.  
710 (D) The Br<sup>-</sup>-binding site in T1r2. The anomalous difference Fourier map (4.5  $\sigma$ , red) is  
711 overlaid to the Cl<sup>-</sup>-bound T1r2a/T1r3LBD structure. (E) The Br<sup>-</sup>-binding site in T1r2. The  
712 2.7 Å-anomalous difference Fourier map (4.5  $\sigma$ , red) of the Cl<sup>-</sup>-bound T1r2a/T1r3LBD, which  
713 is the same map shown in panel B, is overlaid to the Br<sup>-</sup>-binding site in T1r2. No significant  
714 peak was observed.

715

716 **Figure 2—source data 1**

717 **The anomalous difference Fourier maps shown in Figure 2B and 2C.**

718 The structure factor files and the coordinate files used for anomalous difference Fourier  
719 calculation, and the resultant maps were included.

720

721 **Figure 3**

722 **The Cl<sup>-</sup>-binding properties of T1r2a/T1r3LBD.**

723 (A) Representative thermal melt curves of T1r2a/T1r3LBD in the presence of 0.003–10 mM  
724 concentrations of Cl<sup>-</sup> measured using DSF. (B) Dose-dependent  $T_m$  changes of  
725 T1r2a/T1r3LBD by addition of Cl<sup>-</sup>. ( $n = 4$ ) (C) Thermal melting curves of WT and the

726 T1r3-T105A mutant of T1r2a/T1r3LBD in the presence and absence of  $\text{Cl}^-$ , analyzed by  
727 FSEC-TS. ( $n = 1$ ) **(D)** Dose-dependent FRET signal changes of the T1r2aLBD-Cerulean and  
728 T1r3LBD-Venus heterodimer by addition of  $\text{Cl}^-$ . ( $n = 3$ ) **(E)** FRET index increases by adding  
729 10 mM  $\text{Cl}^-$  or 1 mM L-glutamine to the WT or T1r3-T105A mutant  
730 T1r2aLBD-Cerulean/T1r3LBD-Venus heterodimer relative to that in the absence of any  
731 ligand in the absence of  $\text{Cl}^-$ . ( $n = 3$ ) **(F)** Dose-dependent FRET signal changes of the  
732 T1r2aLBD-Cerulean and T1r3LBD-Venus heterodimer induced by the addition of  
733 L-glutamine in the presence and absence of  $\text{Cl}^-$ . ( $n = 3$ ) The experiments were performed two  
734 (panels A, B, D, and E), three (C and WT), four (F and  $+\text{Cl}^-$  condition), or one (C and mutant;  
735 F and  $-\text{Cl}^-$  condition) time(s), and the results from one representative experiment are shown  
736 with numbers of technical replicates. Data points represent mean and s.e.m.

737

### 738 **Figure 3—figure supplement 1**

#### 739 **The properties of T1r2a/T1r3LBD in the presence and absence of $\text{Cl}^-$ .**

740 **(A)** Binding analysis of gluconate by DSF. 0.1, 1, and 10 mM of L-glutamine, as a  
741 representative ligand, and sodium gluconate was added to T1r2a/T1r3LBD in 20 mM  
742 HEPES-NaOH, 300 mM NaCl, pH 7.5. The mean increases of  $T_m$  ( $\Delta T_m$ ) from that in the  
743 absence of a ligand (54.1 °C, measured on the same sample,  $n = 2$ ) are plotted. Error bars are  
744 in s.e.m. ( $n = 4$ ). **(B)** Representative thermal melt curves of T1r2a/T1r3LBD in the presence  
745 or absence of  $\text{Cl}^-$ , measured by DSF in the same condition in Figure 3C, and the panels C, D  
746 in this figure. **(C, D)** The L-glutamine-binding to T1r2a/T1r3LBD was measured by  
747 isothermal titration calorimetry. The upper and lower panels show the raw data and integrated  
748 heat signals upon L-glutamine injection to T1r2a/T1r3LBD in the presence (C) and absence  
749 (D) of  $\text{Cl}^-$ . The binding isotherms were fitted assuming 1 ligand: 1 heterodimer binding. The  
750 experiments were performed one (panel A), two (B) four (C), or five (D) time(s), and the



751 results from one representative experiment are shown with numbers of technical replicates.

752

753 **Figure 3—source data 1**

754 **Excel file with numerical data used for Figure 3.**

755

756 **Figure 4**

757 **Electrophysiological and behavioral analyses of the T1r-mediated Cl<sup>-</sup> responses in**  
758 **mouse.**

759 (A–D) Results of single fiber recordings from the mouse chorda tympani nerve. (A)  
760 Representative recordings of single fibers that connect to T1r-expressing taste cells. The  
761 stimuli were 10 mM NMDG-Cl, 100 mM sucrose, 100 mM sucrose + 10 mM NMDG-Cl, 20  
762 mM L-glutamine, or 20 mM L-glutamine + 10 mM NMDG-Cl. Lines indicate the application  
763 of stimuli to the tongue. All the responses were suppressed by lingual treatment with a T1r  
764 blocker, Gur (right). (B) Impulse frequencies in response to the concentration series of  
765 NMDG-Cl, NaCl, or KCl before and after Gur treatment in WT mice. Responses to  
766 NMDG-gluconate are also shown. The mean number of net impulses per 10 s (mean  
767 response) ± s.e.m. in Gur-sensitive fibers ( $n = 5–6$  from six mice). (C) Impulse frequencies in  
768 response to the concentration series of NMDG-Cl before and after Gur treatment were  
769 measured in T1r3-KO mice ( $n = 4–5$  from three mice). Responses to NMDG-gluconate are  
770 also shown. (D) Impulse frequencies to 20 mM L-glutamine or 100 mM sucrose in the  
771 absence or presence of 10-mM NMDG-Cl before and after Gur treatment. Responses to 20  
772 mM L-glutamine or 100 mM sucrose by T1r3-KO mouse are also shown. Values are mean ±  
773 s.e.m. ( $n = 3–5$  from three mice each). \*, \*\*: paired  $t$ -test;  $P < 0.05$  (\*) and  $< 0.01$  (\*\*). (E)  
774 Amount of fluid intake for water and 10-mM NMDG-Cl in the two-bottle preference tests.  
775 Values are mean ± s.e.m. ( $n = nine$  mice) (F) NMDG-Cl intake shown in (E) normalized to

776 water intake (preference score) in the two-bottle preference tests. A score > 50% indicates that  
777 the taste solution was preferred over water.

778

779 **Figure 4—source data 1**

780 **Excel file with numerical data used for Figure 4.**

781

782 **List of Figure supplements and source data**

783 Figure 2—figure supplement 1

784 Figure 2—figure supplement 2

785 Figure 2—source data 1

786 Figure 3—figure supplement 1

787 Figure 3—source data 1

788 Figure 4—source data 1

789

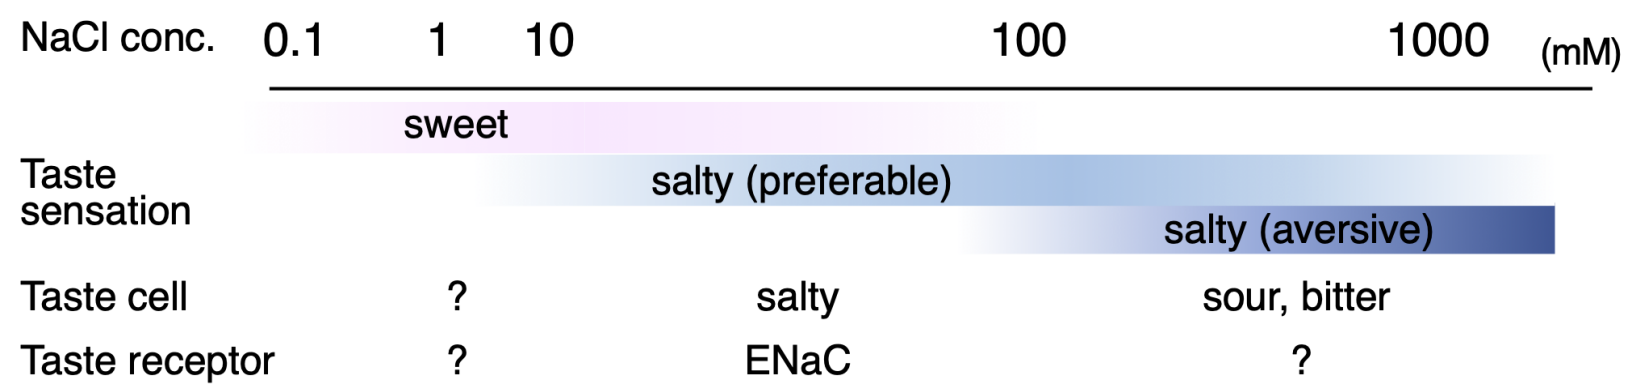

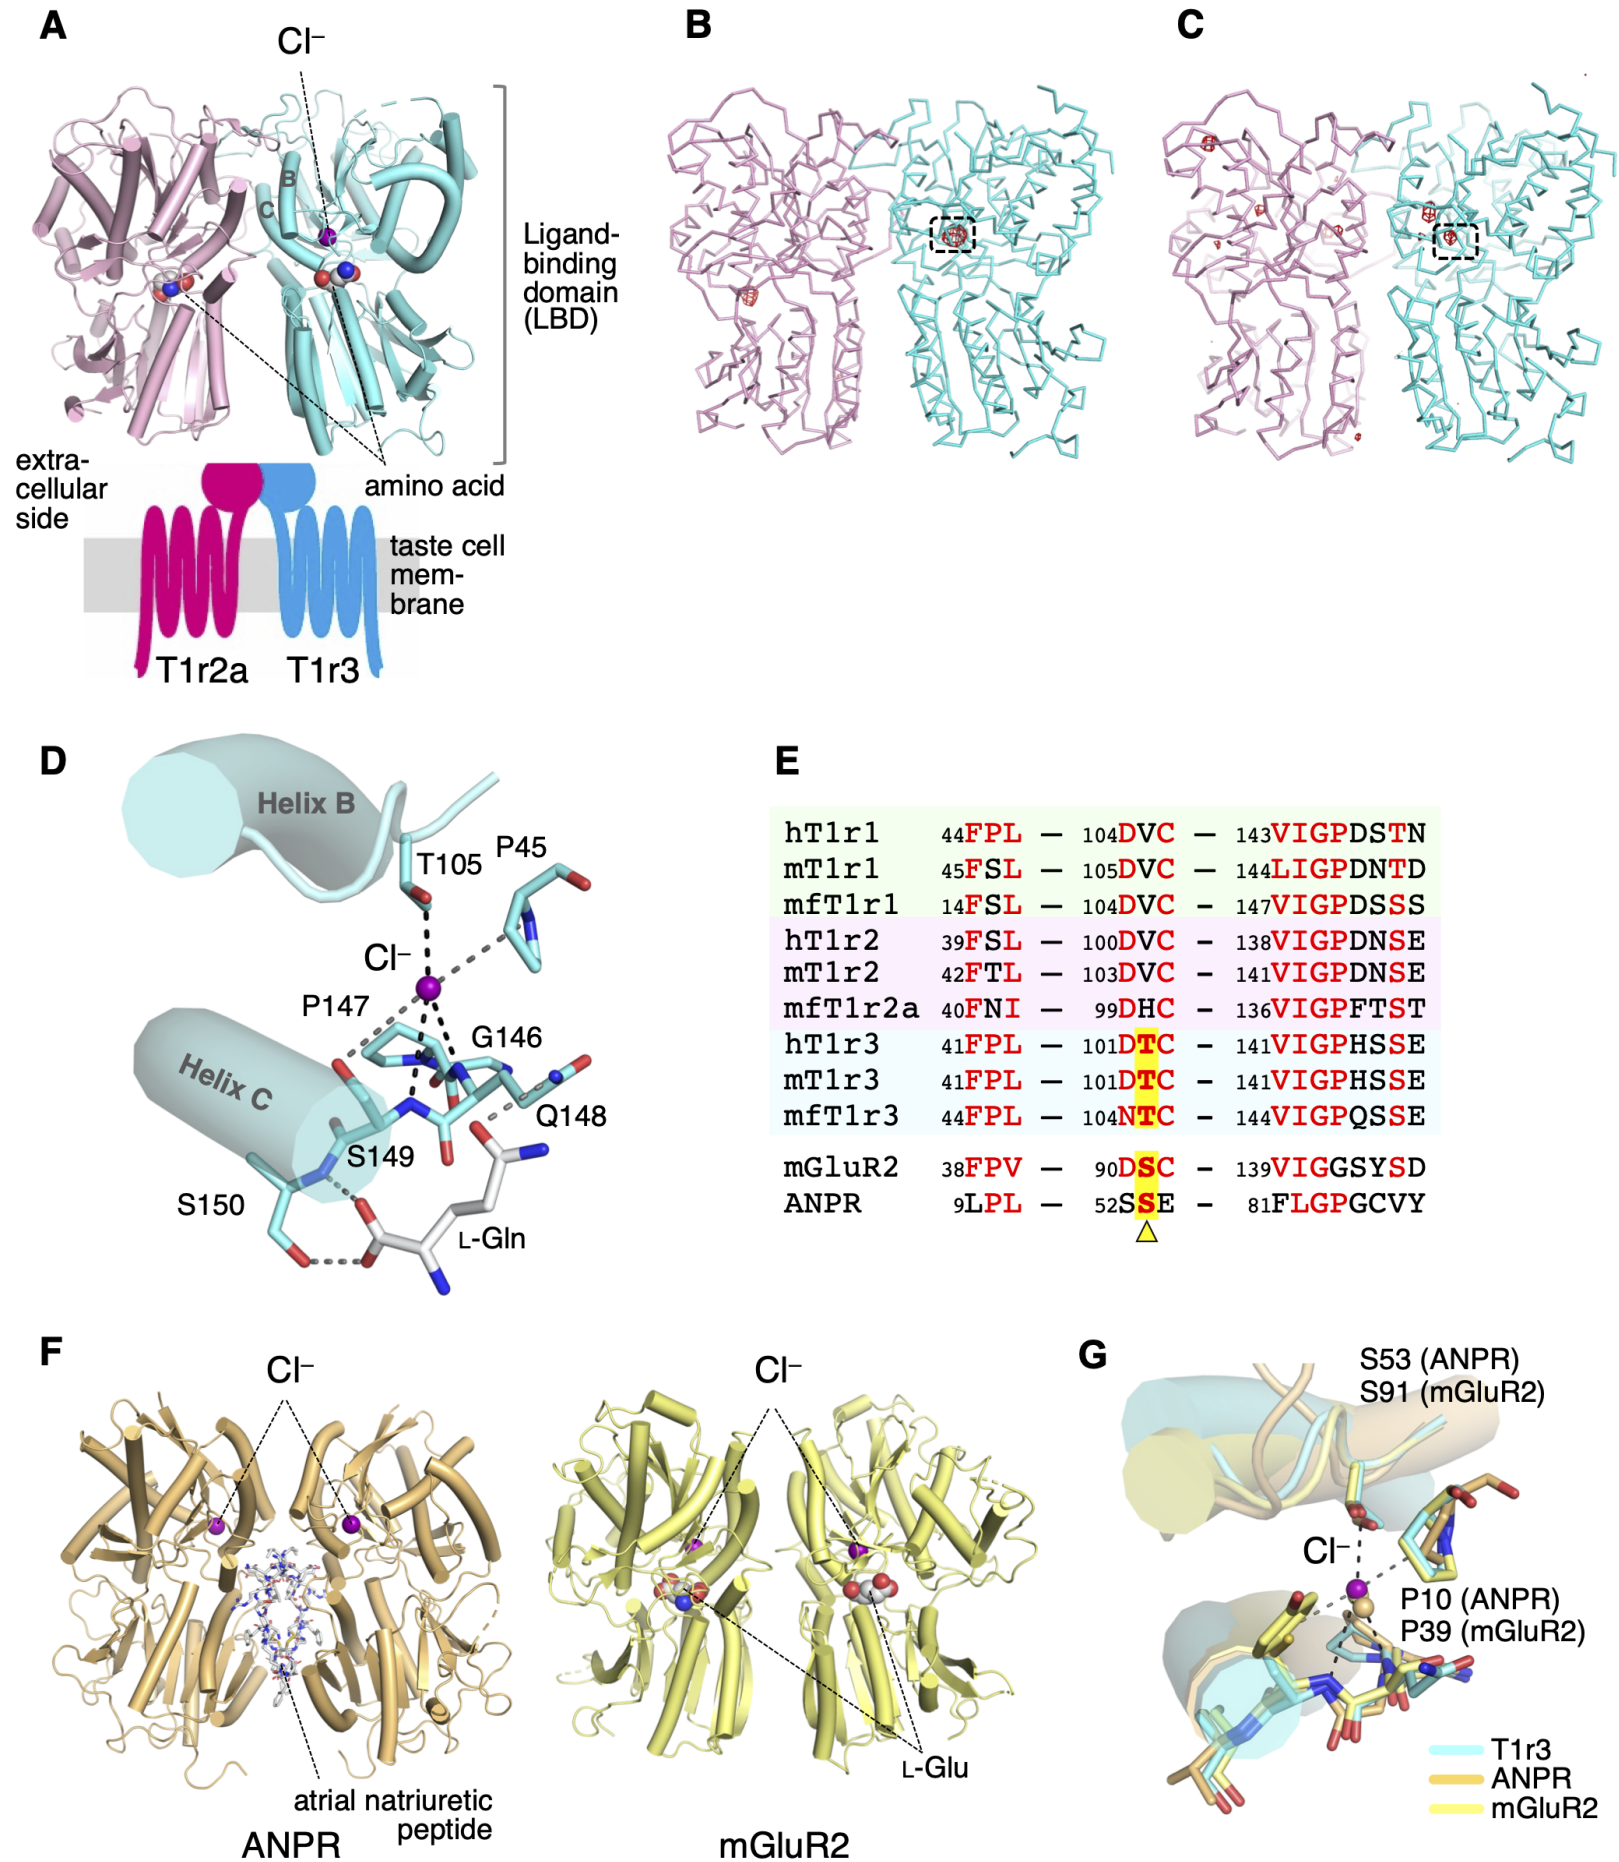

X-ray data collection statistics of T1r2a/T1r3LBD-Fab16A complex.

|                                               | <b>Br<sup>-</sup>-bound</b>                           | <b>Cl<sup>-</sup>-bound</b>                           |
|-----------------------------------------------|-------------------------------------------------------|-------------------------------------------------------|
| Beamline                                      | SPring-8<br>BL41XU                                    | Photon Factory<br>BL-1A                               |
| Detector                                      | PILATUS6M                                             | EIGER X4M                                             |
| Wavelength (Å)                                | 0.9194                                                | 2.7                                                   |
| Space group                                   | <i>P</i> 2 <sub>1</sub> 2 <sub>1</sub> 2 <sub>1</sub> | <i>P</i> 2 <sub>1</sub> 2 <sub>1</sub> 2 <sub>1</sub> |
| Cell dimensions                               |                                                       |                                                       |
| <i>a</i> (Å)                                  | 102.8                                                 | 102.8                                                 |
| <i>b</i> (Å)                                  | 121.6                                                 | 120.8                                                 |
| <i>c</i> (Å)                                  | 129.9                                                 | 129.1                                                 |
| Resolution (Å)                                | 50-3.41 (3.43-3.41)                                   | 49.8-3.32 (3.33-3.32)                                 |
| <i>R</i> <sub>sym</sub> (%) <sup>*</sup>      | 0.094 (0.808)                                         | 0.089 (0.865)                                         |
| <i>I</i> / $\sigma$ ( <i>I</i> ) <sup>*</sup> | 16.4 (2.3)                                            | 15.1 (2.45)                                           |
| Completeness (%) <sup>*</sup>                 | 99.8 (99.2)                                           | 99.6 (97.8)                                           |
| Redundancy <sup>*</sup>                       | 7.0 (7.0)                                             | 6.9 (6.8)                                             |

<sup>\*</sup>Values in parentheses refer to data in the highest resolution shells.

**A**

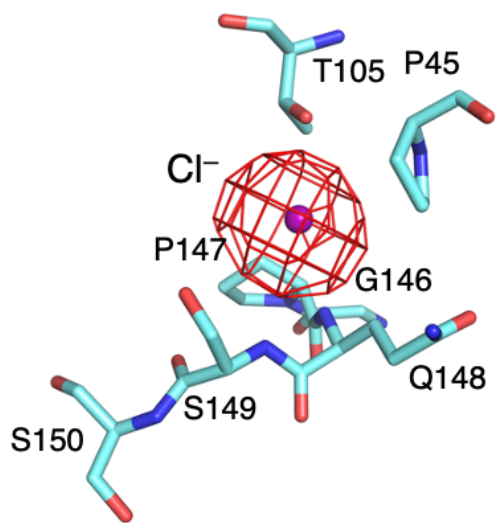

**B**

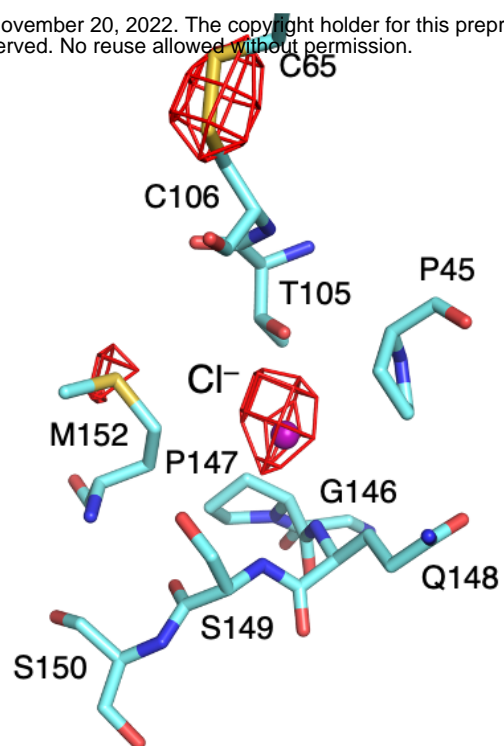

**C**

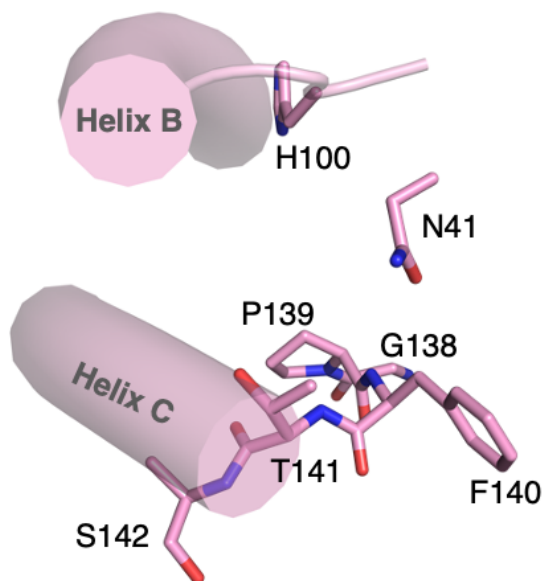

**D**

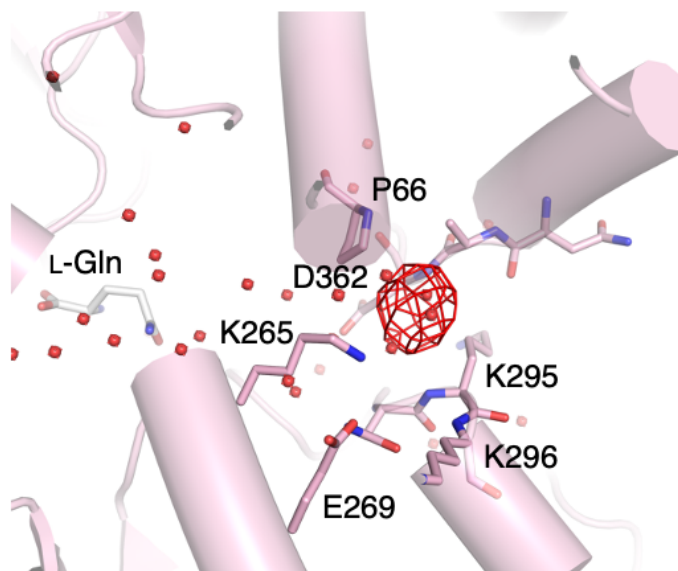

**E**

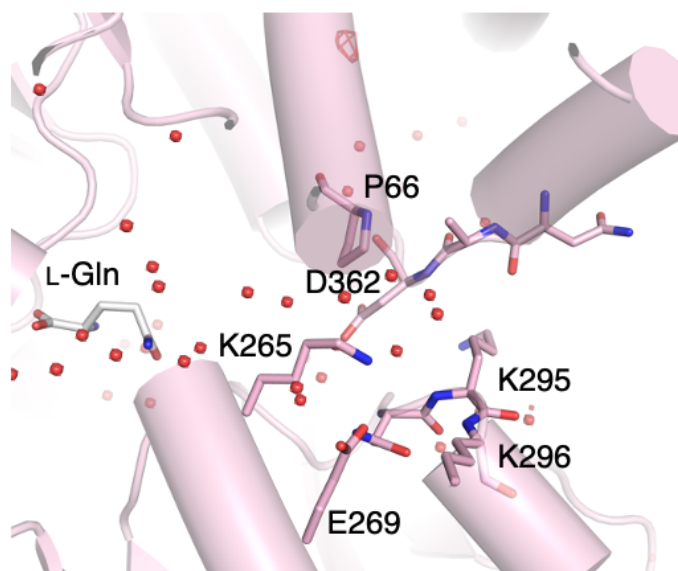

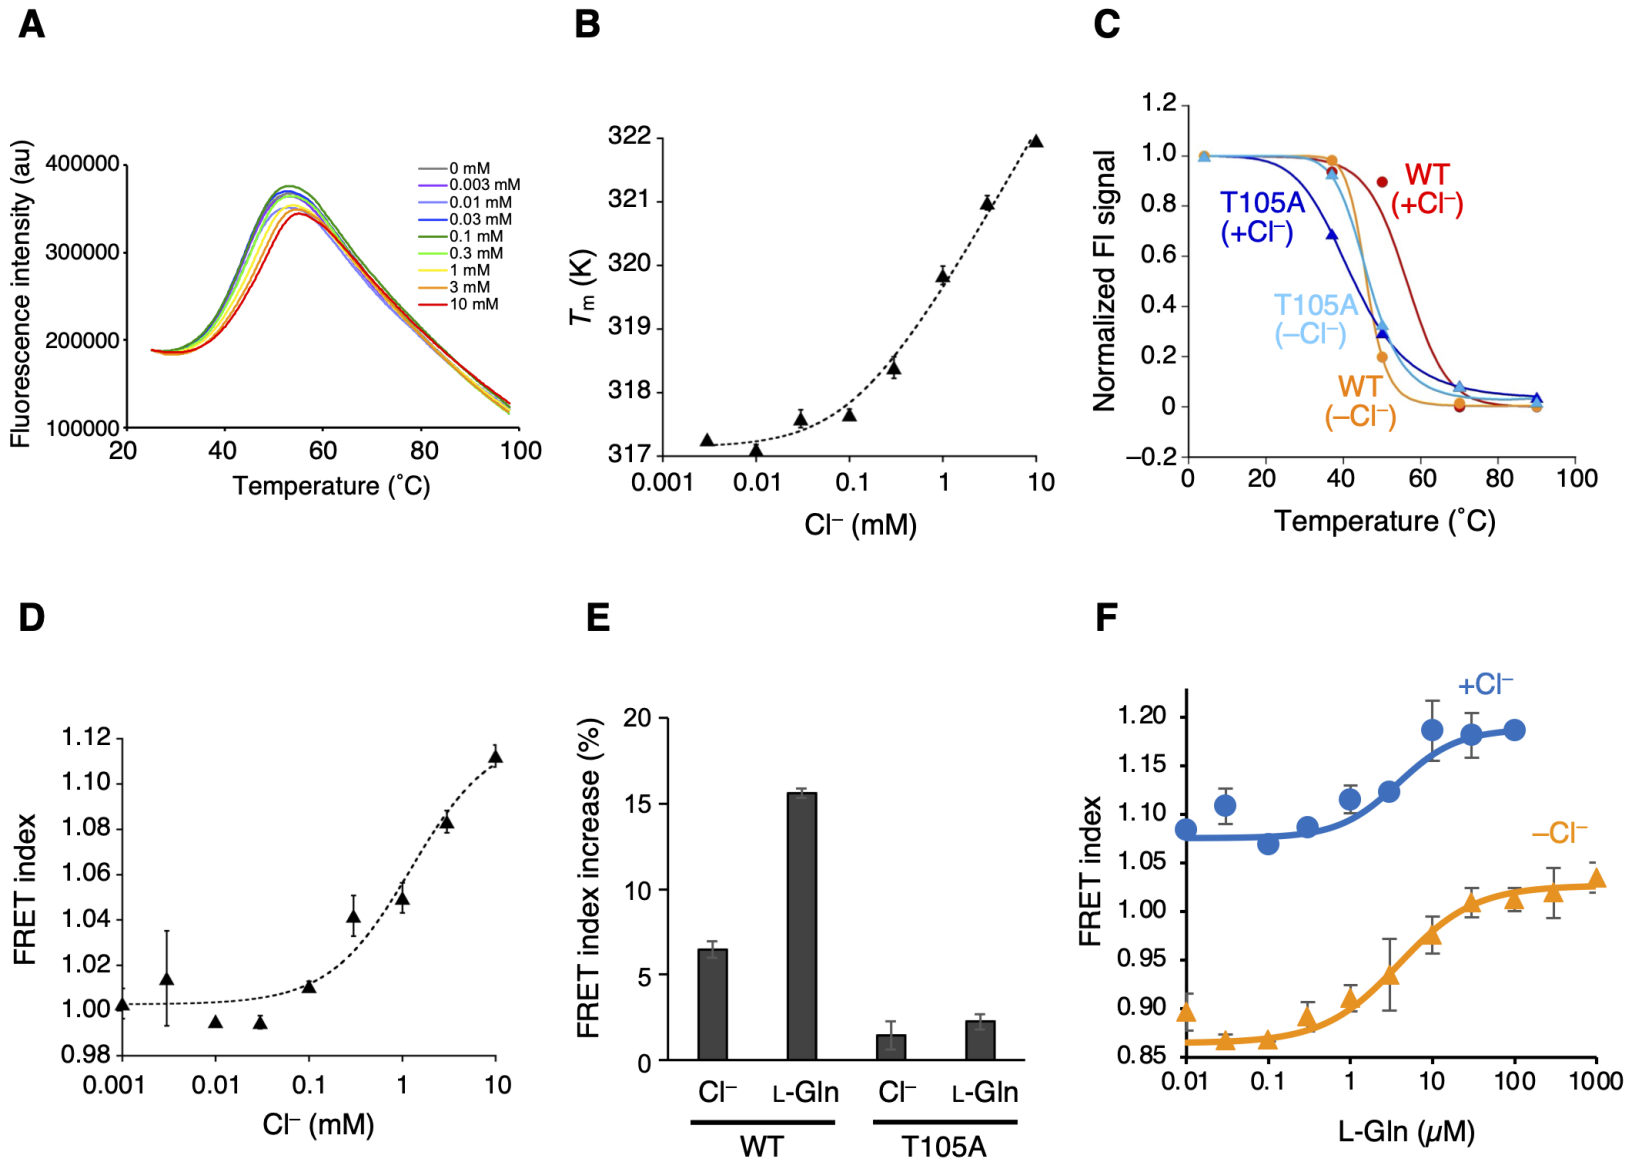



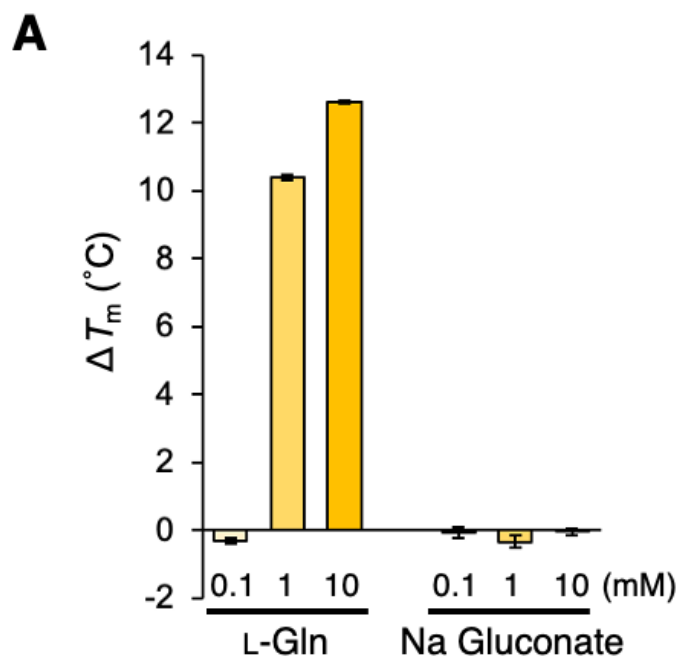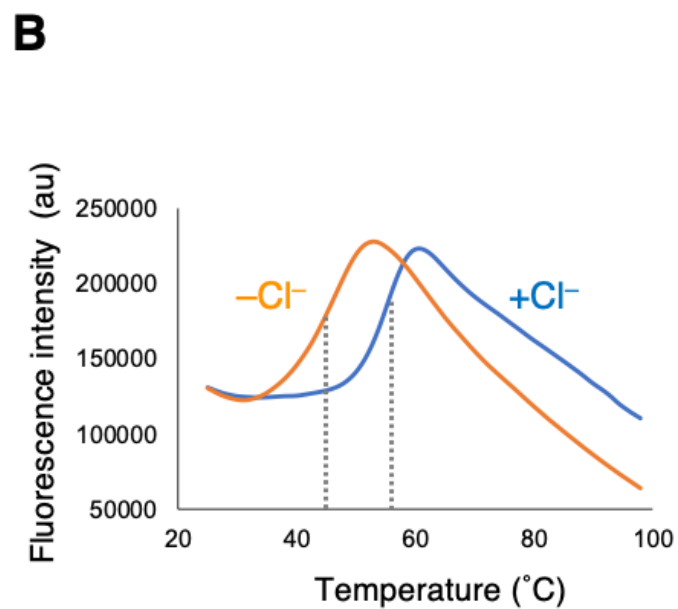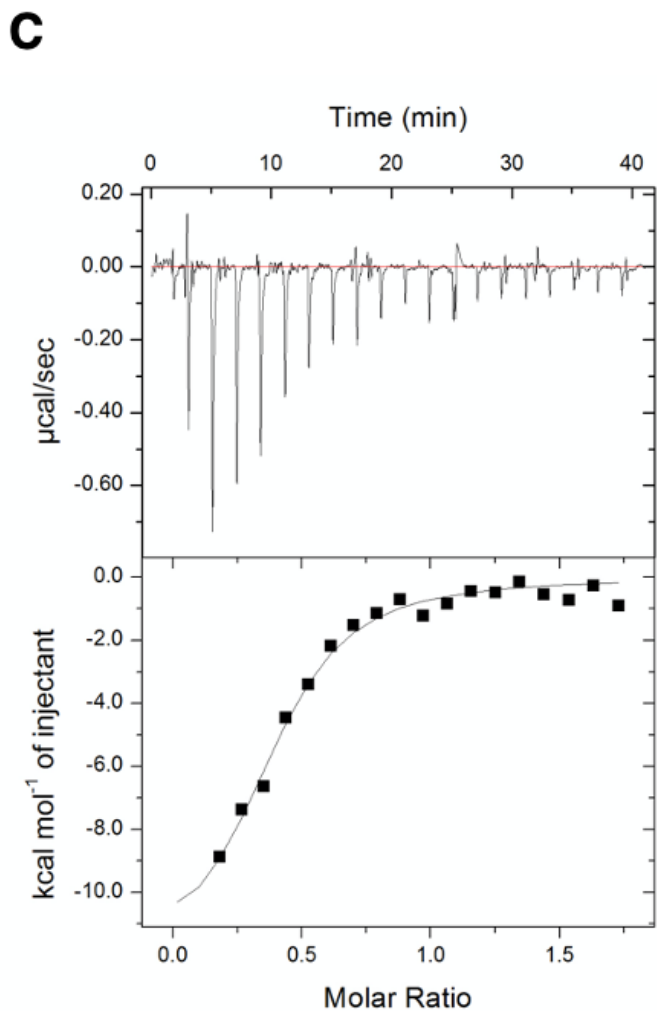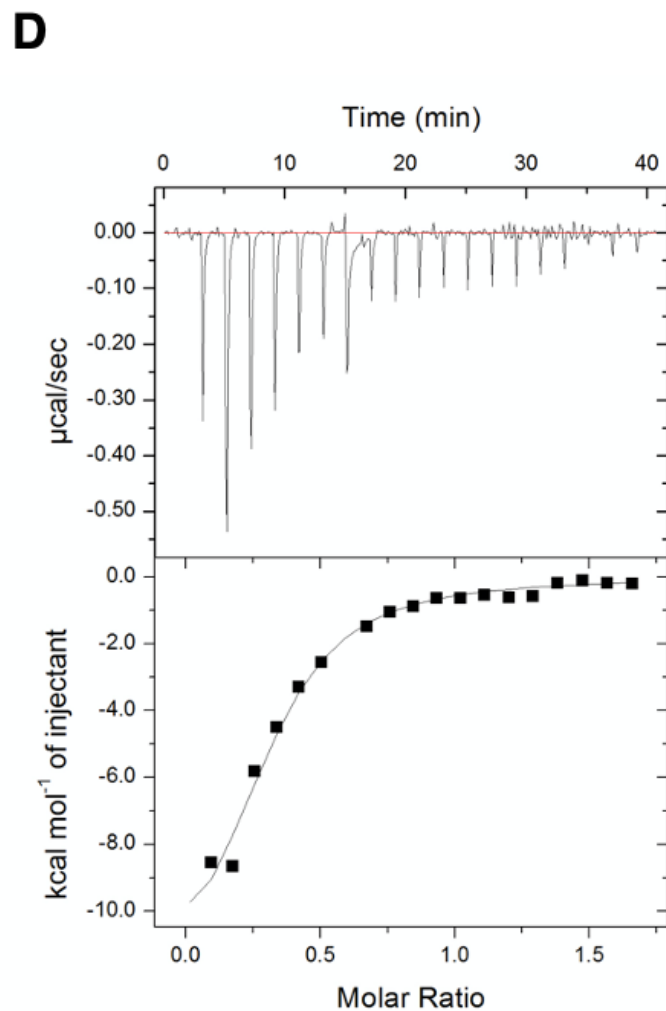



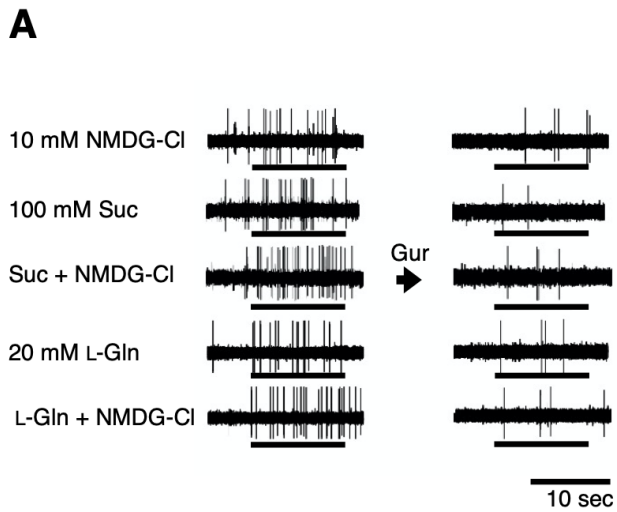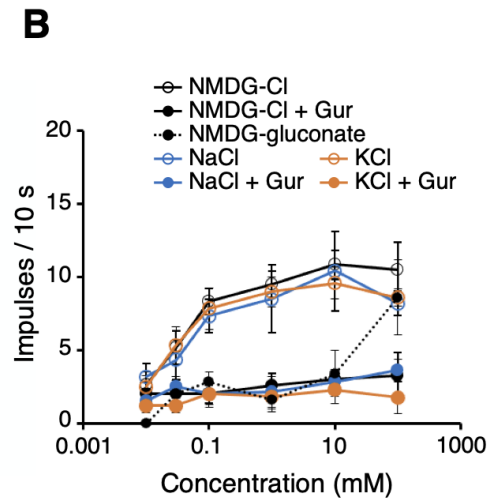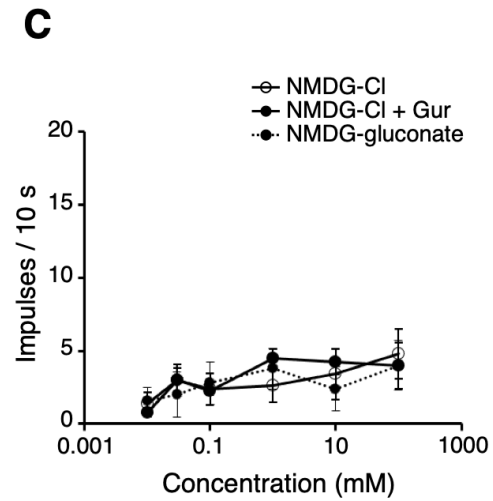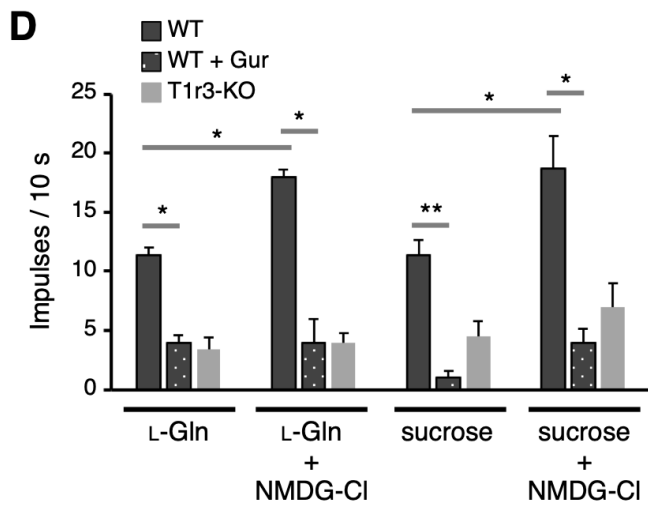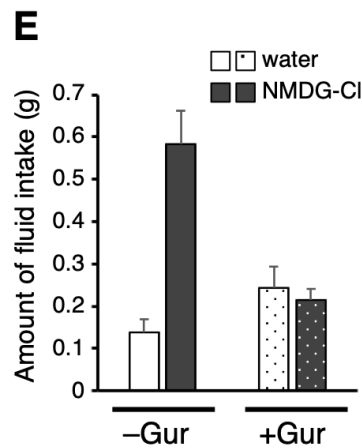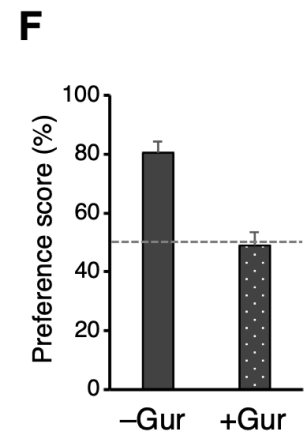

Source: http://biorxiv.org/content/10.1101/2022.02.23.481615v3.full.pdf
